# Supplementary material for: New insights into the asymmetric Diels–Alder reaction: the endo- and S-selective retro-Diels–Alder reaction
Source: Royal Society of Chemistry journal article supplement (doi:10.1039/c5ra17788j), 2015-01-01
Supplement: c5ra17788j1.pdf [file c5ra17788j1.pdf]

## Electronic Supplementary Information

### New insights into the asymmetric Diels-Alder reaction: the *Endo*- and *S*-selective retro-Diels-Alder reaction

Na Li<sup>a, b</sup>, Xianrui Liang<sup>a, b</sup>, and Weike Su<sup>a\*</sup>

<sup>a</sup> Collaborative Innovation Center of Yangtze River Delta Region Green Pharmaceuticals, Zhejiang University of Technology, Hangzhou 310014, China.

<sup>b</sup> College of Pharmaceutical Sciences, Zhejiang University of Technology, Hangzhou 310014, China.

E-mail: pharmlab@zjut.edu.cn; Tel: +86 57188320899.

#### Contents

|                                                                                                         |         |
|---------------------------------------------------------------------------------------------------------|---------|
| General Experimental Details.....                                                                       | S2-S4   |
| General Information.....                                                                                | S2      |
| The synthesis of imidazolethione catalysts.....                                                         | S2      |
| General procedure for the synthesis of 3-Phenylbicyclo[2.2.1]hept-5-ene-2-carbaldehyde.....             | S2      |
| Table S1 Imidazolethione-catalyzed asymmetric Diels-Alder reactions.....                                | S3      |
| Table S2 Optimization of reaction conditions by using different solvents.....                           | S3      |
| Table S3 Optimization of reaction conditions by using different acid co-catalysts.....                  | S4      |
| Figure S1 The changes in ee of both adducts in Diels-Alder reaction over the time.....                  | S4      |
| Figure S2 The stability of isolated aldehyde adducts in CH <sub>3</sub> OH-H <sub>2</sub> O system..... | S5      |
| Table S4 Enantioselectivity of various substrates in CH <sub>3</sub> CN-H <sub>2</sub> O system.....    | S5      |
| Experimental characterization data for compounds.....                                                   | S6-S9   |
| NMR spectra and HPLC analyses for products.....                                                         | S10-S44 |
| NMR spectra of products.....                                                                            | S10-S18 |
| HPLC spectra of products.....                                                                           | S19-S27 |
| HPLC spectra for Table 2 in manuscript.....                                                             | S28-S31 |
| HPLC spectra for Figure 1 in manuscript.....                                                            | S31-S37 |
| HPLC spectra for Figure 2 in manuscript.....                                                            | S38-S41 |
| HPLC spectra for Figure S2 in ESI.....                                                                  | S41-S44 |
| The molecular models and calculation results.....                                                       | S44-S45 |
| References.....                                                                                         | S45     |

## General Experimental Details

### General Information:

All commercial solvents and reagents were used as obtained without further purification. Column chromatography was performed using silica-gel (200-400 mesh). High resolution Mass spectra were obtained using Bruker micrOTOF-Q II.  $^1\text{H}$  NMR and  $^{13}\text{C}$  NMR spectra were recorded at VARIAN-400 operating at 400 MHz and 100 MHz respectively, the chemical shifts were referenced to internal tetramethylsilane (TMS,  $\delta = 0.0$  ppm) for  $^1\text{H}$ , the central line of  $\text{CDCl}_3$  ( $\delta = 77.0$  ppm) for  $^{13}\text{C}$ . Enantiomeric excesses of products were determined by HPLC using a Daicel Chiralcel OD-H, OJ-H column and eluting with hexane/*i*-PrOH.

### The synthesis of imidazolethione catalysts:

Catalysts **1a-d** were prepared according to the literatures.<sup>[1-4]</sup>  $^1\text{H}$  NMR and  $^{13}\text{C}$  NMR data were consistent with previously reported values.<sup>[1-4]</sup>

### General procedure for the synthesis of 3-Phenylbicyclo[2.2.1]hept-5-ene-2-carbaldehyde

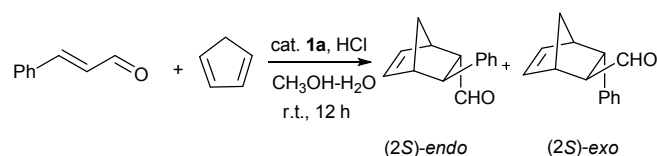

To a solution of catalyst **1a** (0.012 g, 0.05 mmol) in  $\text{CH}_3\text{OH}/\text{H}_2\text{O}$  (1.9 mL/0.1 mL) was added concentrated hydrochloric acid (0.005 g, 0.05 mmol) and *trans*-cinnamaldehyde (0.132 g, 1 mmol). The solution was stirred for 1-2 minutes before the addition of freshly distilled cyclopentadiene (0.198 g, 3 mmol). The reaction was stirred at room temperature for 12 h until the reaction was judged to be complete by TLC. After removing  $\text{CH}_3\text{OH}$  under vacuo, the crude product dimethyl acetal was hydrolyzed in TFA:  $\text{H}_2\text{O}$ :  $\text{CHCl}_3$  (1:1:2). The solution was stirred for 2 h at room temperature, followed by neutralization by sat. aq.  $\text{NaHCO}_3$  and extraction with  $\text{Et}_2\text{O}$ . The organic solvent was removed with a rotary evaporator. The residue was purified silica-gel chromatography (petroleum ether/ $\text{EtOAc}$ : 15:1) to afford the desired product.  $^1\text{H}$  NMR and  $^{13}\text{C}$  NMR data were consistent with previously reported values.<sup>[5-12]</sup>

**Table S1 Imidazolethione-catalyzed asymmetric Diels-Alder reactions**

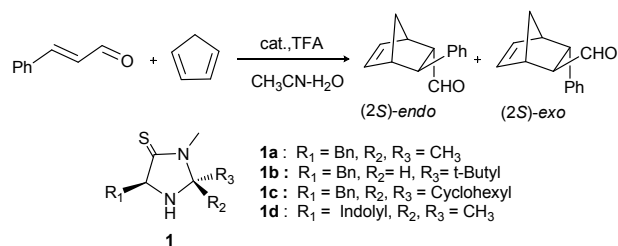

| Entry | Catalyst  | Yield <sup>b</sup> (%) | <i>exo/endo</i> <sup>c</sup> | <i>ee</i> <sup>d</sup> (%) |             |
|-------|-----------|------------------------|------------------------------|----------------------------|-------------|
|       |           |                        |                              | <i>exo</i>                 | <i>endo</i> |
| 1     | <b>1a</b> | 92                     | 1.3:1                        | 59                         | 56          |
| 2     | <b>1b</b> | 83                     | 1.3:1                        | 50                         | 0           |
| 3     | <b>1c</b> | 80                     | 1.3:1                        | 40                         | 23          |
| 4     | <b>1d</b> | 91                     | 1.2:1                        | 67                         | 43          |

<sup>a</sup> Reaction condition: *trans*-cinnamaldehyde (1.0 mmol), cyclopentadiene (5.0 mmol), CH<sub>3</sub>CN (1.9 mL), H<sub>2</sub>O (0.1 mL), catalyst (10 mol%), TFA (10 mol%), r.t., 12 h. <sup>b</sup> Isolated yield. <sup>c</sup> *exo/endo* selectivity was determined by <sup>1</sup>H NMR analysis of a crude reaction mixture. <sup>d</sup> Enantiomeric excess was determined by HPLC analysis after conversion to the corresponding alcohol.

**Table S2 Optimization of reaction conditions by using different solvents.**

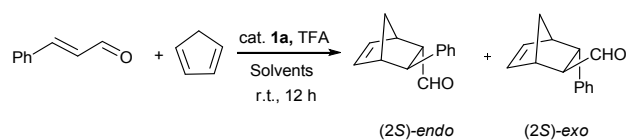

| Entry | Solvent                                           | Yield <sup>b</sup> (%) | <i>exo/endo</i> <sup>c</sup> | <i>ee</i> <sup>d</sup> (%) |             |
|-------|---------------------------------------------------|------------------------|------------------------------|----------------------------|-------------|
|       |                                                   |                        |                              | <i>exo</i>                 | <i>endo</i> |
| 1     | CH <sub>3</sub> CN/H <sub>2</sub> O               | 92                     | 1.3:1                        | 59                         | 56          |
| 2     | CH <sub>3</sub> CN                                | 83                     | 1.1:1                        | 27                         | 25          |
| 3     | THF/H <sub>2</sub> O                              | trace                  | n.d. <sup>e</sup>            | n.d.                       | n.d.        |
| 4     | CH <sub>2</sub> Cl <sub>2</sub> /H <sub>2</sub> O | trace                  | n.d.                         | n.d.                       | n.d.        |
| 5     | CH <sub>3</sub> OH/H <sub>2</sub> O               | 95                     | 1.2:1                        | 88                         | 87          |
| 6     | CH <sub>3</sub> NO <sub>2</sub> /H <sub>2</sub> O | 93                     | 1.3:1                        | 47                         | 41          |

<sup>a</sup> Reaction condition: *trans*-cinnamaldehyde (1.0 mmol), cyclopentadiene (5.0 mmol), organic solvent (1.9 mL), H<sub>2</sub>O (0.1 mL), catalyst **1a** (10 mol%), TFA (10 mol%), r.t., for 12 h. <sup>b</sup> Isolated yield. <sup>c</sup> *exo/endo* selectivity was determined by <sup>1</sup>H NMR analysis of a crude reaction mixture. <sup>d</sup> Enantiomeric excess determined by HPLC analysis. <sup>e</sup> Not determined.

**Table S3 Optimization of reaction conditions by using different acid co-catalysts.**

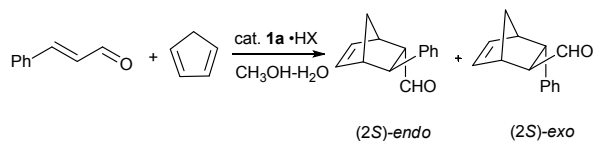

| Entry           | Acid             | <i>T</i> (°C) | t (h) | Yield <sup>b</sup> (%) | <i>exo/endo</i> <sup>c</sup> | <i>ee</i> <sup>d</sup> (%) |                   |
|-----------------|------------------|---------------|-------|------------------------|------------------------------|----------------------------|-------------------|
|                 |                  |               |       |                        |                              | <i>exo</i>                 | <i>endo</i>       |
| 1               | TFA              | 25            | 12    | 92                     | 1.2 : 1                      | 88                         | 87                |
| 2               | TfOH             | 25            | 12    | 93                     | 1.2 : 1                      | 87                         | 86                |
| 3               | HBF <sub>4</sub> | 25            | 12    | 90                     | 1.2 : 1                      | 84                         | 83                |
| 4               | <i>p</i> -TSA    | 25            | 12    | 89                     | 1.1 : 1                      | 83                         | 83                |
| 5               | HCl              | 25            | 12    | 95                     | 1.2 : 1                      | 95                         | 94                |
| 6               | AcOH             | 25            | 12    | 20                     | 1.1 : 1                      | n.d.                       | n.d. <sup>e</sup> |
| 7               | PhCOOH           | 25            | 12    | 23                     | 1.1 : 1                      | n.d.                       | n.d.              |
| 8               | HCl              | 0             | 48    | 73                     | 1.2 : 1                      | 95                         | 95                |
| 9               | HCl              | -10           | 72    | 64                     | 1.2 : 1                      | 94                         | 93                |
| 10 <sup>f</sup> | HCl              | 25            | 12    | 95                     | 1.2 : 1                      | 95                         | 94                |

<sup>a</sup> Reaction condition: *trans*-cinnamaldehyde (1.0 mmol), cyclopentadiene (5.0 mmol), CH<sub>3</sub>OH (1.9 mL), H<sub>2</sub>O (0.1 mL), catalyst **1a** (10 mol%), acid (10 mol%). <sup>b</sup> Isolated yield. <sup>c</sup> *exo/endo* selectivity was determined by <sup>1</sup>H NMR analysis of crude reaction mixture. <sup>d</sup> Enantiomeric excess determined by HPLC analysis. <sup>e</sup> Not determined. <sup>f</sup> catalyst **1a** (5 mol%), HCl (5 mol%), cyclopentadiene (3 equiv.).

**Figure S1 The changes in *ee* of both adducts in Diels-Alder reaction over the time.**

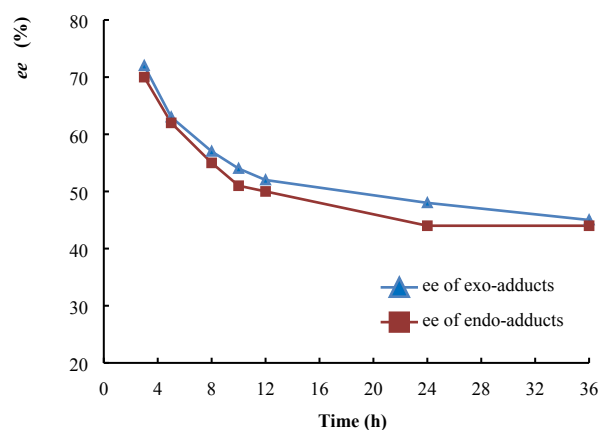

**Fig. S1** The changes in *ee* of both adducts in Diels-Alder reaction over the time: *trans*-cinnamaldehyde (1.0 mmol), cyclopentadiene (3.0 mmol), 5% **1a**, 5% TFA, CH<sub>3</sub>CN (1.9 mL), H<sub>2</sub>O (0.1 mL), r.t.

**Figure S2 The stability of isolated aldehyde adducts in CH<sub>3</sub>OH-H<sub>2</sub>O system.**

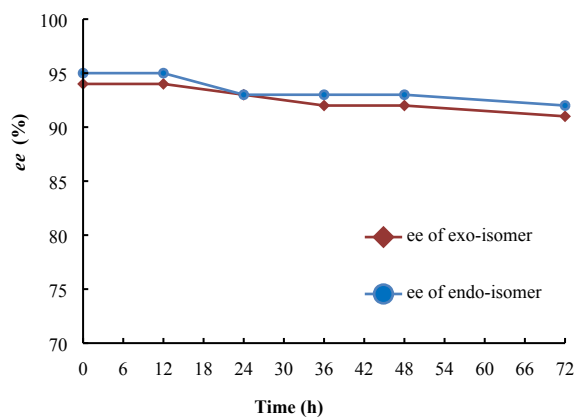

**Fig. S2** The stability of isolated aldehyde adducts in CH<sub>3</sub>OH-H<sub>2</sub>O system: aldehyde products (1 mmol, 95% *ee* in *endo*-isomers, 94% *ee* in *exo*-isomer), 20 mol% **1a**, 100 mol% HCl, CH<sub>3</sub>OH (1.9 mL), H<sub>2</sub>O (0.1 mL), r.t., 72 h.

**Table S4 Enantioselectivity of various substrates in CH<sub>3</sub>CN-H<sub>2</sub>O system.**

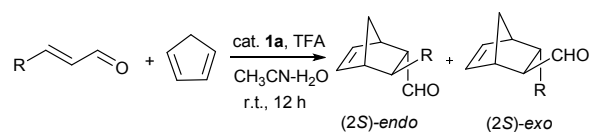

| Entry          | R                                          | Yield <sup>b</sup> (%) | <i>exo/endo</i> <sup>c</sup> | <i>ee</i> <sup>d</sup> (%) |             |
|----------------|--------------------------------------------|------------------------|------------------------------|----------------------------|-------------|
|                |                                            |                        |                              | <i>exo</i>                 | <i>endo</i> |
| 1              | Ph                                         | 92                     | 1.3:1                        | 59                         | 56          |
| 2              | <i>m</i> -MeC <sub>6</sub> H <sub>4</sub>  | 93                     | 1.2:1                        | 62                         | 57          |
| 3              | <i>o</i> -OMeC <sub>6</sub> H <sub>4</sub> | 95                     | 1.2:1                        | 34                         | 34          |
| 4              | <i>p</i> -OMeC <sub>6</sub> H <sub>4</sub> | 93                     | 1.1:1                        | 11                         | 9           |
| 5              | <i>p</i> -FC <sub>6</sub> H <sub>4</sub>   | 91                     | 1.2:1                        | 40                         | 37          |
| 6              | <i>p</i> -ClC <sub>6</sub> H <sub>4</sub>  | 90                     | 1.1:1                        | 34                         | 32          |
| 7              | <i>m</i> -ClC <sub>6</sub> H <sub>4</sub>  | 91                     | 1:1                          | 46                         | 44          |
| 8 <sup>e</sup> | Furyl                                      | 82                     | 1.1:1                        | 18                         | 13          |
| 9              | <i>n</i> -Pr                               | 90                     | 1.2:1                        | 77                         | 58          |

<sup>a</sup> Reaction condition:  $\alpha,\beta$ -unsaturated aldehyde (1.0 mmol), cyclopentadiene (3.0 mmol), CH<sub>3</sub>CN (1.9 mL), H<sub>2</sub>O (0.1 mL), catalyst **1a** (5 mol%), HCl (5 mol%), <sup>b</sup> Isolated yield. <sup>c</sup> *exo/endo* selectivity was determined by <sup>1</sup>H NMR analysis of a crude reaction mixture. <sup>d</sup> Enantiomeric excess was determined by HPLC analysis. <sup>e</sup> 10 mol% catalyst, 24 h.

## Experimental characterization data for compounds

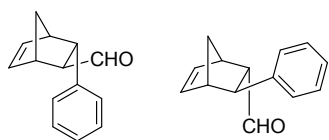

### 3-Phenylbicyclo[2.2.1]hept-5-ene-2-carbaldehyde (Table 4, entry 1).

188.1 mg, 95% yield (colorless oil); 1.3/1.0 *exo/endo*, *exo* 95% *ee*, *endo* 94% *ee*. Enantioselectivity was determined by HPLC after reduction with NaBH<sub>4</sub>/MeOH. [Chiralcel OJ-H (0.46 cm × 25 cm). (from Daicel Chemical Ind., Ltd.) hexane/*i*-PrOH, 70/30, 0.8 mL/min, 225 nm],  $t_r$  =11.0 min, 24.5 min, 31.4 min, 42.5 min. HRMS (ESI, *m/z*): [M+Na]<sup>+</sup>, calcd. for C<sub>14</sub>H<sub>14</sub>NaO: 221.0929, found: 233.0937.

<sup>1</sup>H NMR and <sup>13</sup>C NMR data were consistent with previously reported values. [5-12]

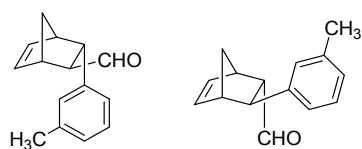

### 3-(*m*-tolyl)bicyclo[2.2.1]hept-5-ene-2-carbaldehyde (Table 4, entry 2).

201.5 mg, 95% yield (colorless oil); 1.1/1.0 *exo/endo*, *exo* 93% *ee*, *endo* 93% *ee*. Enantioselectivity was determined by HPLC after reduction with NaBH<sub>4</sub>/MeOH. [Chiralcel OJ-H (0.46 cm × 25 cm). (from Daicel Chemical Ind., Ltd.) hexane/*i*-PrOH, 80/20, 0.8 mL/min, 210 nm],  $t_r$  =9.5 min, 15.8 min, 22.8 min, 27.0 min. HRMS (ESI, *m/z*): [M+Na]<sup>+</sup>, calcd. for C<sub>15</sub>H<sub>16</sub>NaO: 235.1092, found: 235.1093.

<sup>1</sup>H NMR (400 MHz, CDCl<sub>3</sub>) (two isomers):  $\delta$  9.88 (d, *J* = 2.0 Hz, 1H), 9.56 (d, *J* = 2.2 Hz, 1H), 7.22-6.91 (m, 8H), 6.39 (dd, *J* = 5.6, 3.4 Hz, 1H), 6.31 (dd, *J* = 5.4, 3.4 Hz, 1H), 6.14 (dd, *J* = 5.6, 2.8 Hz, 1H), 6.06 (dd, *J* = 5.2, 2.8 Hz, 1H), 3.67 (t, *J* = 4.0, 1H), 3.31 (s, 1H), 3.20 (d, *J* = 1.6 Hz, 2H), 3.10-3.03 (m, 2H), 2.98-2.96 (m, 2H), 2.59-2.57 (m, 1H), 2.33 (s, 3H), 2.30 (s, 3H), 1.80 (d, *J* = 8.6 Hz, 1H), 1.62-1.53 (m, 3H).

<sup>13</sup>C NMR (100 MHz, CDCl<sub>3</sub>) (two isomers):  $\delta$  202.4, 201.8, 143.5, 142.5, 139.0, 138.0, 137.5, 136.5, 136.1, 133.8, 128.6, 128.4, 128.2, 127.9, 126.9, 126.9, 124.7, 124.2, 60.9, 59.5, 48.9, 48.6, 47.8, 47.3, 46.3, 46.1, 45.8, 45.3, 21.4.

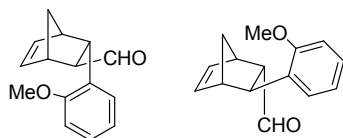

**3-(2-Methoxyphenyl)bicyclo[2.2.1]hept-5-ene-2-carbaldehyde (Table 4, entry 3).**

218.9 mg, 96% yield (colorless oil); 1.2/1.0 *exo/endo*, *exo* 96% *ee*, *endo* 94% *ee*. Enantioselectivity was determined by HPLC after reduction with NaBH<sub>4</sub>/MeOH. [Chiralcel OJ-H (0.46 cm × 25 cm). (from Daicel Chemical Ind., Ltd.) hexane/*i*-PrOH, 95/5, 0.6 mL/min, 210 nm], *t<sub>r</sub>* = 19.9 min, 23.6 min, 25.7 min, 38.4 min. HRMS (ESI, *m/z*): [M+Na]<sup>+</sup>, calcd. for C<sub>15</sub>H<sub>16</sub>NaO<sub>2</sub>: 251.1034, found: 251.1043.

<sup>1</sup>H NMR and <sup>13</sup>C NMR data were consistent with previously reported values. [5-12]

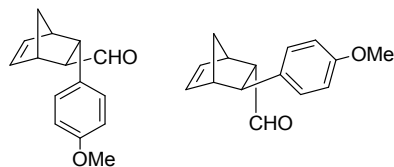

**3-(4-methoxyphenyl)bicyclo[2.2.1]hept-5-ene-2-carbaldehyde (Table 4, entry 4).**

216.7 mg, 95% yield (colorless oil); 1.1/1.0 *exo/endo*, *exo* 95% *ee*, *endo* 94% *ee*. Enantioselectivity was determined by HPLC after reduction with NaBH<sub>4</sub>/MeOH. [Chiralcel OJ-H (0.46 cm × 25 cm). (from Daicel Chemical Ind., Ltd.) hexane/*i*-PrOH, 85/15, 20min → 80/20, 0.8 mL/min, 210 nm], *t<sub>r</sub>* = 18.6 min, 27.7 min, 49.9 min, 67.1 min. HRMS (ESI, *m/z*): [M+Na]<sup>+</sup>, calcd. for C<sub>15</sub>H<sub>16</sub>NaO<sub>2</sub>: 251.1040, found: 251.1043.

<sup>1</sup>H NMR and <sup>13</sup>C NMR data were consistent with previously reported values. [5-12]

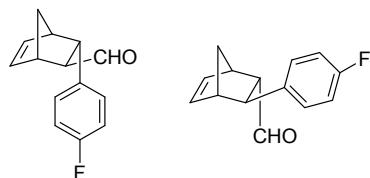

**3-(4-fluorophenyl)bicyclo[2.2.1]hept-5-ene-2-carbaldehyde (Table 4, entry 5).**

198.7 mg, 92% yield (colorless oil); 1.1/1.0 *exo/endo*, *exo* 93% *ee*, *endo* 93% *ee*. Enantioselectivity was determined by HPLC after reduction with NaBH<sub>4</sub>/MeOH. [Chiralcel OJ-H (0.46 cm × 25 cm). (from Daicel Chemical Ind., Ltd.) hexane/*i*-PrOH, 85/15, 0.8 mL/min, 210 nm], *t<sub>r</sub>* = 9.3 min, 16.1 min, 25.8 min, 44.2 min. HRMS (ESI, *m/z*): [M+Na]<sup>+</sup>, calcd. for C<sub>14</sub>H<sub>13</sub>FNaO: 239.0848, found: 239.0843.

$^1\text{H}$  NMR (400 MHz,  $\text{CDCl}_3$ ) (two isomers):  $\delta$  9.87 (d,  $J = 2.0$  Hz, 1H), 9.56 (d,  $J = 2.2$  Hz, 1H), 7.21-7.17 (m, 3H), 7.09-7.06 (m, 3H), 6.99-6.87 (m, 3H), 6.39 (dd,  $J = 5.6, 3.2$  Hz, 1H), 6.33 (dd,  $J = 5.6, 3.2$  Hz, 1H), 6.15 (dd,  $J = 5.6, 2.8$  Hz, 1H), 6.03 (dd,  $J = 5.6, 2.9$  Hz, 1H), 3.69 (t,  $J = 4.2$  Hz, 1H), 3.33 (s, 1H), 3.21-3.16 (m, 2H), 3.08-3.04 (m, 2H), 2.92-2.89 (m, 1H), 2.53-2.51 (m, 1H), 1.78-1.75 (m, 1H), 1.64-1.53 (m, 3H).

$^{13}\text{C}$  NMR (100 MHz,  $\text{CDCl}_3$ ) (two isomers):  $\delta$  202.8, 202.1, 162.3, 162.2, 159.9, 159.8, 138.9, 136.2, 136.1, 133.5, 129.0, 129.0, 128.5, 128.5, 115.2, 115.0, 114.8, 114.5, 61.0, 59.6, 48.4, 48.4, 47.5, 47.0, 45.4, 45.0, 45.0, 44.6.

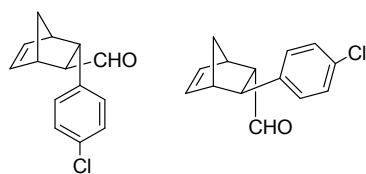

**3-(4-Chlorophenyl)bicyclo[2.2.1]hept-5-ene-2-carbaldehyde (Table 4, entry 6).**

211.2 mg, 91% yield (colorless oil); 1.1/1.0 *exo/endo*, *exo* 93% *ee*, *endo* 92% *ee*. Enantioselectivity was determined by HPLC after reduction with  $\text{NaBH}_4/\text{MeOH}$ . [Chiralcel OJ-H (0.46 cm  $\times$  25 cm). (from Daicel Chemical Ind., Ltd.) hexane/*i*-PrOH, 90/10, 10 min,  $\rightarrow$ 80/20, 0.6 mL/min, 210 nm],  $t_r = 15.1$  min, 21.3 min, 36.7 min, 51.1 min. HRMS (ESI,  $m/z$ ):  $[\text{M}+\text{Na}]^+$ , calcd. for  $\text{C}_{14}\text{H}_{13}\text{ClNaO}$ :255.0567, found: 255.0575.

$^1\text{H}$  NMR and  $^{13}\text{C}$  NMR data were consistent with previously reported values. [5-12]

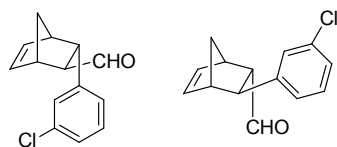

**3-(3-Chlorophenyl)bicyclo[2.2.1]hept-5-ene-2-carbaldehyde (Table 4, entry 7).**

215.8 mg, 93% yield (colorless oil); 1.0/1.0 *exo/endo*, *exo* 92% *ee*, *endo* 90% *ee*. Enantioselectivity was determined by HPLC after reduction with  $\text{NaBH}_4/\text{MeOH}$ . [Chiralcel OJ-H (0.46 cm  $\times$  25 cm). (from Daicel Chemical Ind., Ltd.) hexane/*i*-PrOH, 99.9/0.1, 20 min,  $\rightarrow$  98/2, 0.6 mL/min, 210 nm],  $t_r = 46.3$  min, 50.1 min, 53.9 min, 55.9 min. HRMS (ESI,  $m/z$ ):  $[\text{M}+\text{Na}]^+$ , calcd. for  $\text{C}_{14}\text{H}_{13}\text{ClNaO}$ :255.0548, found: 255.0547.

$^1\text{H}$  NMR (400 MHz,  $\text{CDCl}_3$ ) (two isomers):  $\delta$  9.87 (d,  $J = 2.0$  Hz, 1H), 9.56 (d,  $J = 2.1$  Hz, 1H), 7.24-7.19 (m, 2H), 7.16-7.09 (m, 5H), 7.01-6.99 (m, 1H), 6.39 (dd,  $J = 5.6, 3.2$  Hz, 1H), 6.33 (dd,  $J = 5.6, 3.2$  Hz, 1H), 6.15 (dd,  $J = 5.8, 2.8$  Hz, 1H), 6.02 (dd,  $J = 5.6, 2.8$  Hz, 1H), 3.69 (dd,  $J = 5.2, 3.6$  Hz, 1H), 3.35 (s, 1H), 3.23-3.19 (m, 2H), 3.10-3.05 (m, 2H), 2.94-2.92 (m, 1H), 2.55 (d,  $J$



= 5.2 Hz, 1H), 1.77-1.75 (m, 1H), 1.64-1.56 (m, 3H).

$^{13}\text{C}$  NMR (100 MHz,  $\text{CDCl}_3$ ) (two isomers):  $\delta$  202.2, 201.6, 145.5, 144.5, 138.8, 136.3, 136.0, 134.1, 133.7, 133.6, 129.6, 129.1, 127.7, 127.2, 126.2, 126.1, 125.9, 125.5, 60.8 59.3, 48.3, 48.2, 48.1, 47.5, 47.1, 45.4, 45.0

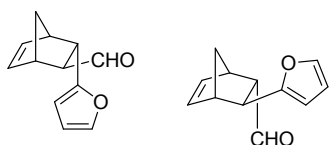

**3-(furan-2-yl)bicyclo[2.2.1]hept-5-ene-2-carbaldehyde (Table 4, entry 8).**

157.9 mg, 84% yield (colorless oil); 1.0/1.0 *exo/endo*, *exo* 93% *ee*, *endo* 90% *ee*. Enantioselectivity was determined by HPLC after reduction with  $\text{NaBH}_4/\text{MeOH}$ . [Chiralcel OJ-H (0.46 cm  $\times$  25 cm). (from Daicel Chemical Ind., Ltd.) hexane/*i*-PrOH, 90/10, 0.8 mL/min, 220 nm],  $t_r$  = 11.5 min, 23.2 min, 25.2 min, 29.0 min. HRMS (ESI,  $m/z$ ):  $[\text{M}+\text{Na}]^+$ , calcd. for  $\text{C}_{12}\text{H}_{12}\text{NaO}_2$ : 211.0723, found: 211.0730.

$^1\text{H}$  NMR and  $^{13}\text{C}$  NMR data were consistent with previously reported values. <sup>[5-12]</sup>

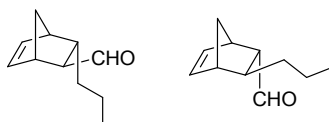

**3-propylbicyclo[2.2.1]hept-5-ene-2-carbaldehyde (Table 4, entry 9).**

152.7 mg, 92% yield (colorless oil); 1.2/1.0 *exo/endo*, *exo* 93% *ee*, *endo* 92% *ee*. Enantioselectivity was determined by HPLC after reduction with  $\text{NaBH}_4/\text{MeOH}$ . [Chiralcel OD-H (0.46 cm  $\times$  25 cm). (from Daicel Chemical Ind., Ltd.) hexane/*i*-PrOH, 99.5/0.5, 0.6 mL/min, 210 nm],  $t_r$  = 28.7 min, 29.9 min, 32.0 min, 33.9 min. This compound was identified by corresponding alcohol due to the instability of aldehyde products. HRMS (ESI,  $m/z$ ):  $[\text{M}+\text{H}]^+$ , calcd. for  $\text{C}_{11}\text{H}_{19}\text{O}$ : 167.1423, found: 167.1430.

$^1\text{H}$  NMR and  $^{13}\text{C}$  NMR data were consistent with previously reported values. <sup>[5-12]</sup>

# NMR spectra and HPLC analyses for products

## NMR spectra of products

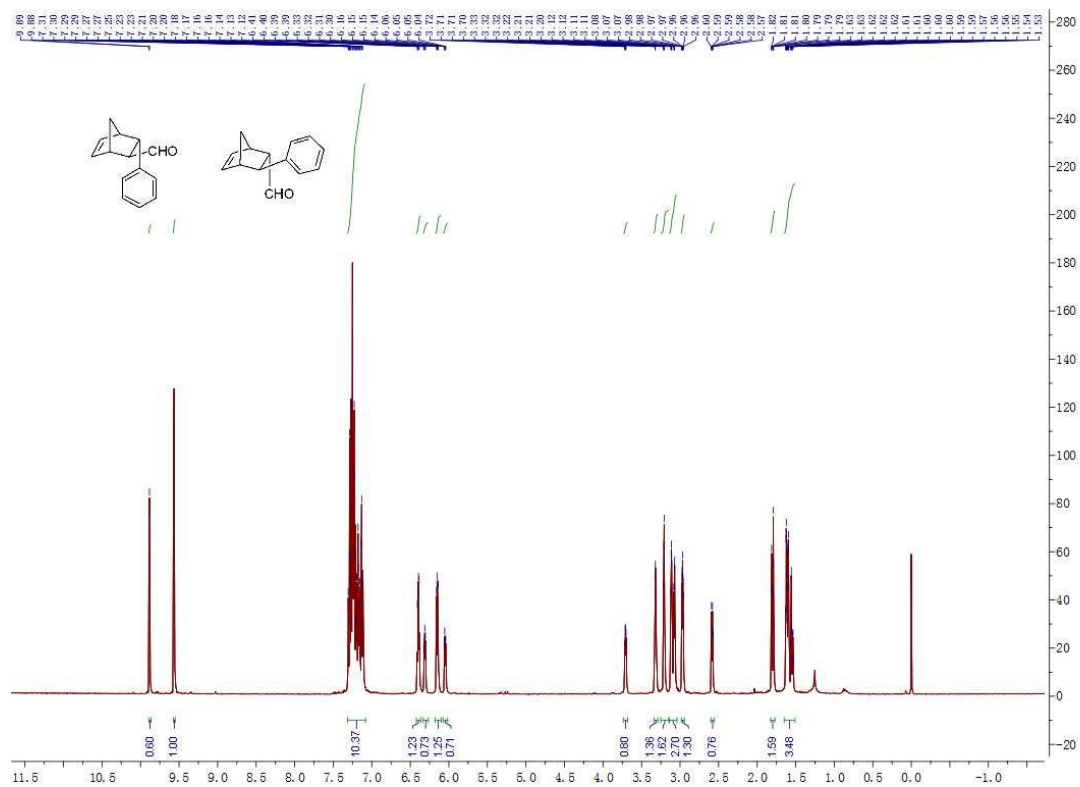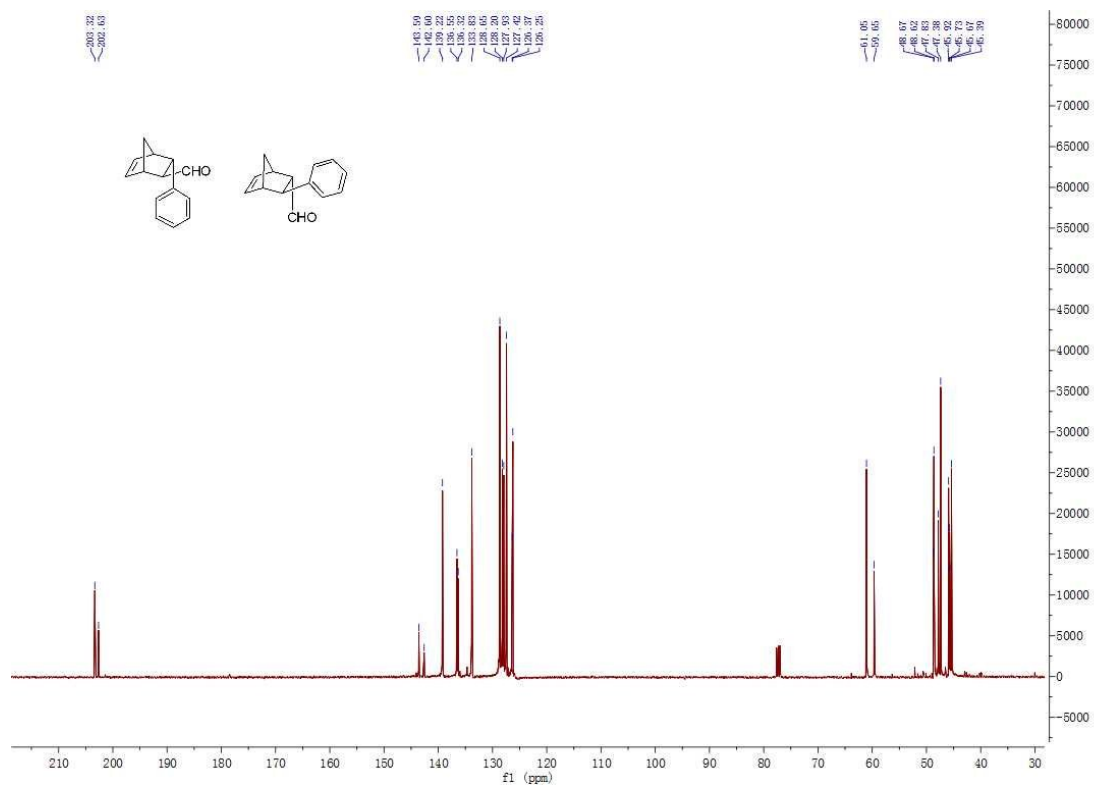











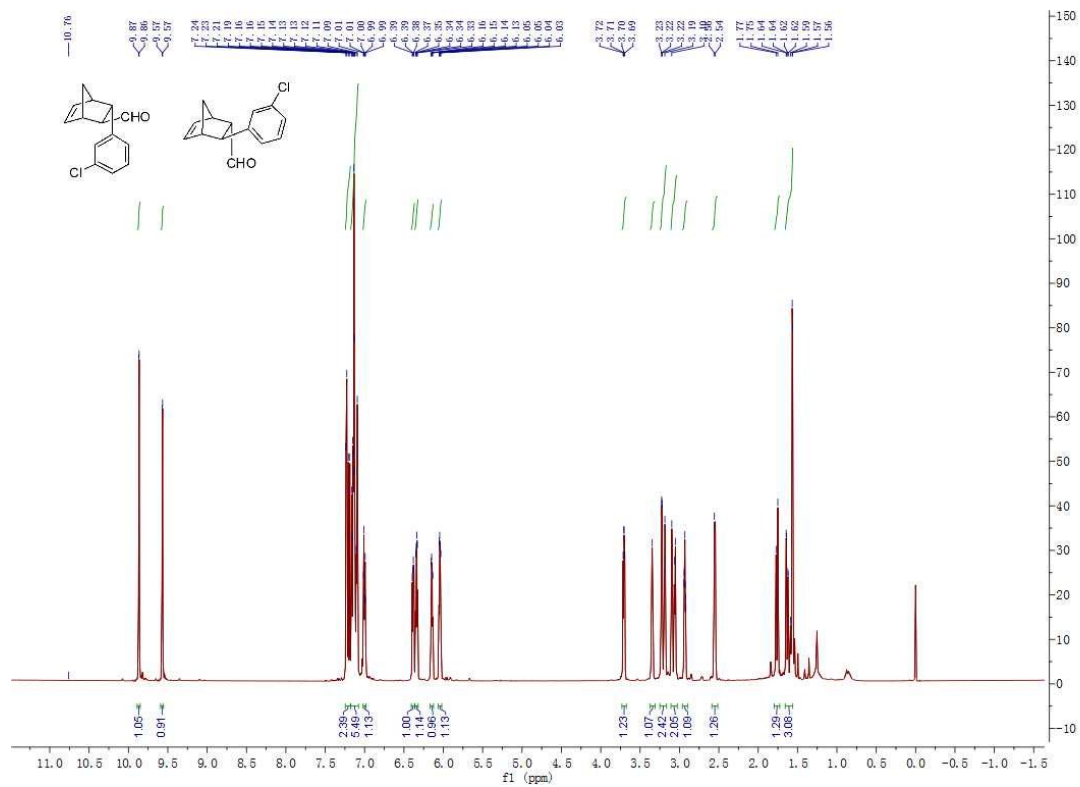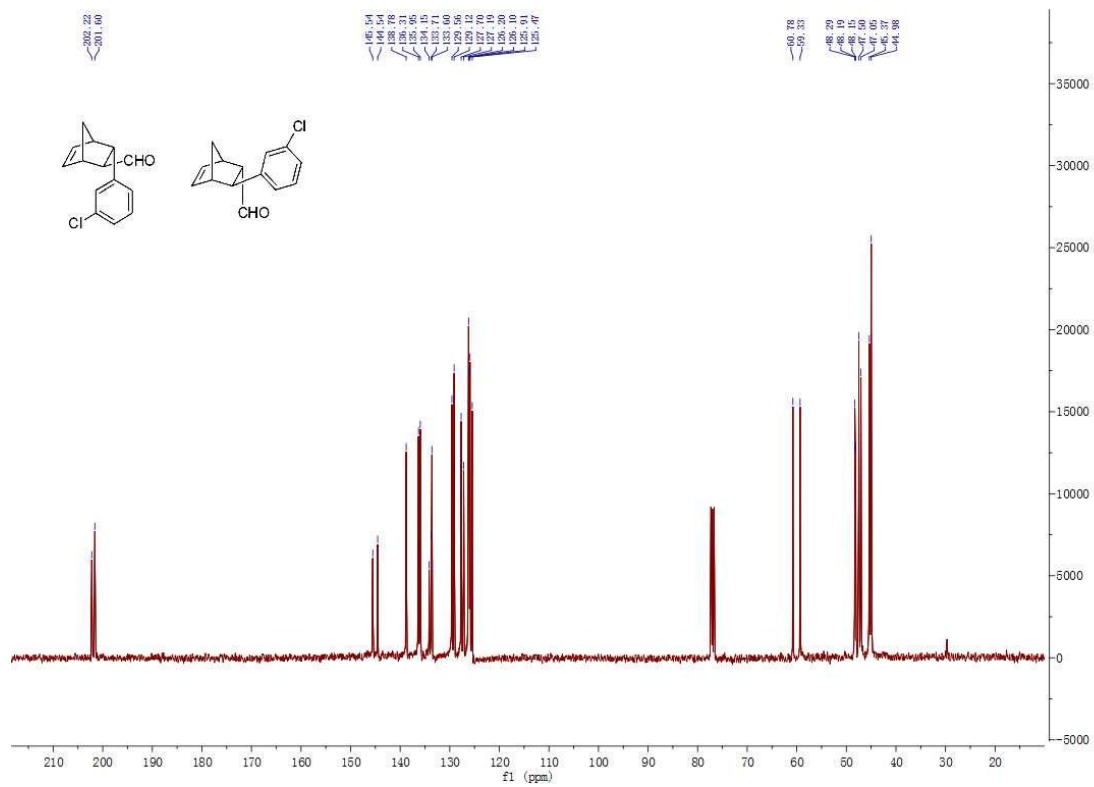



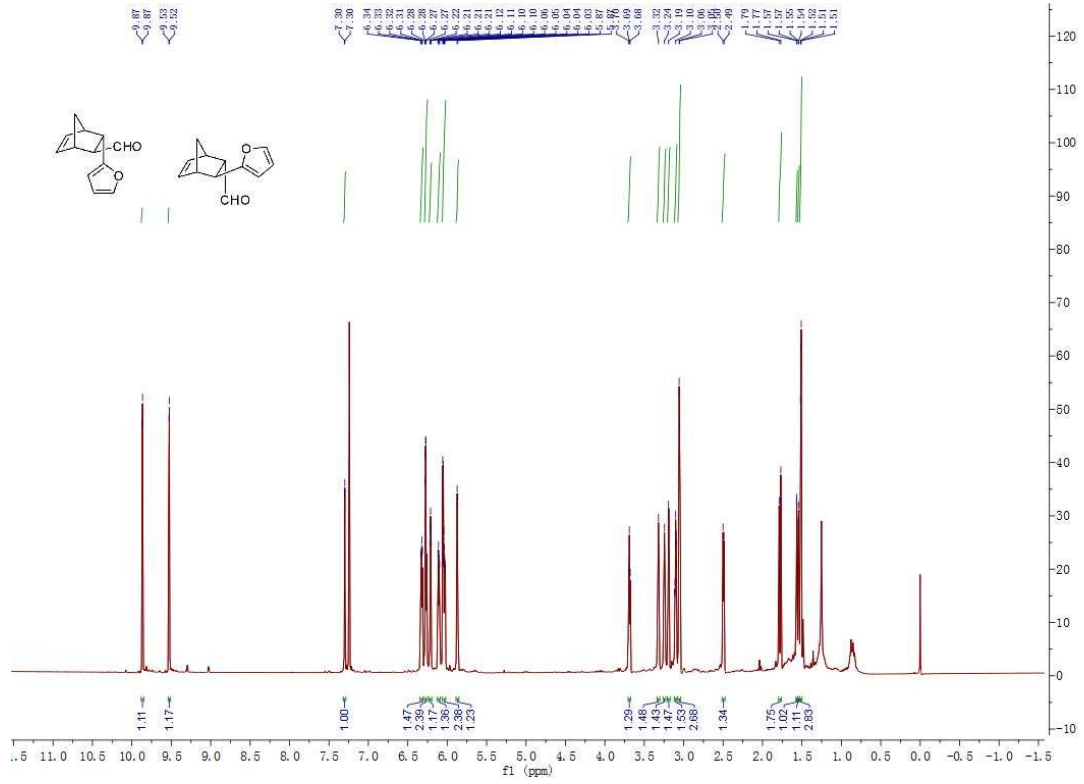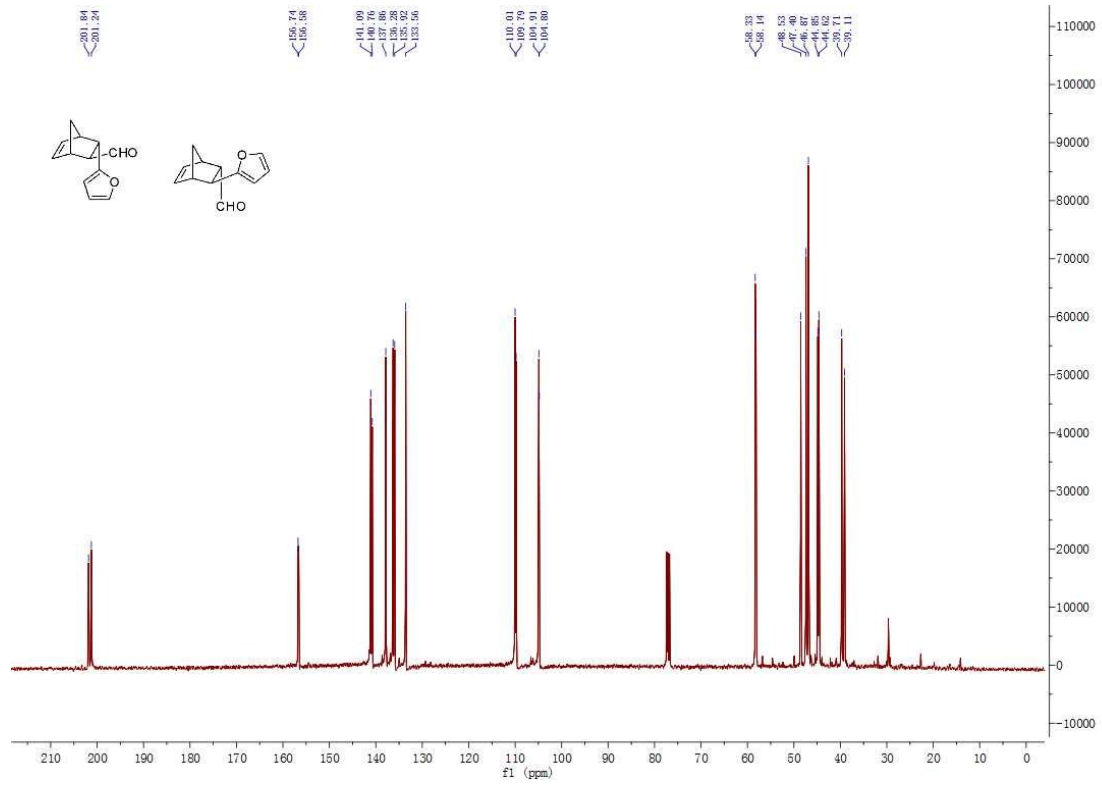

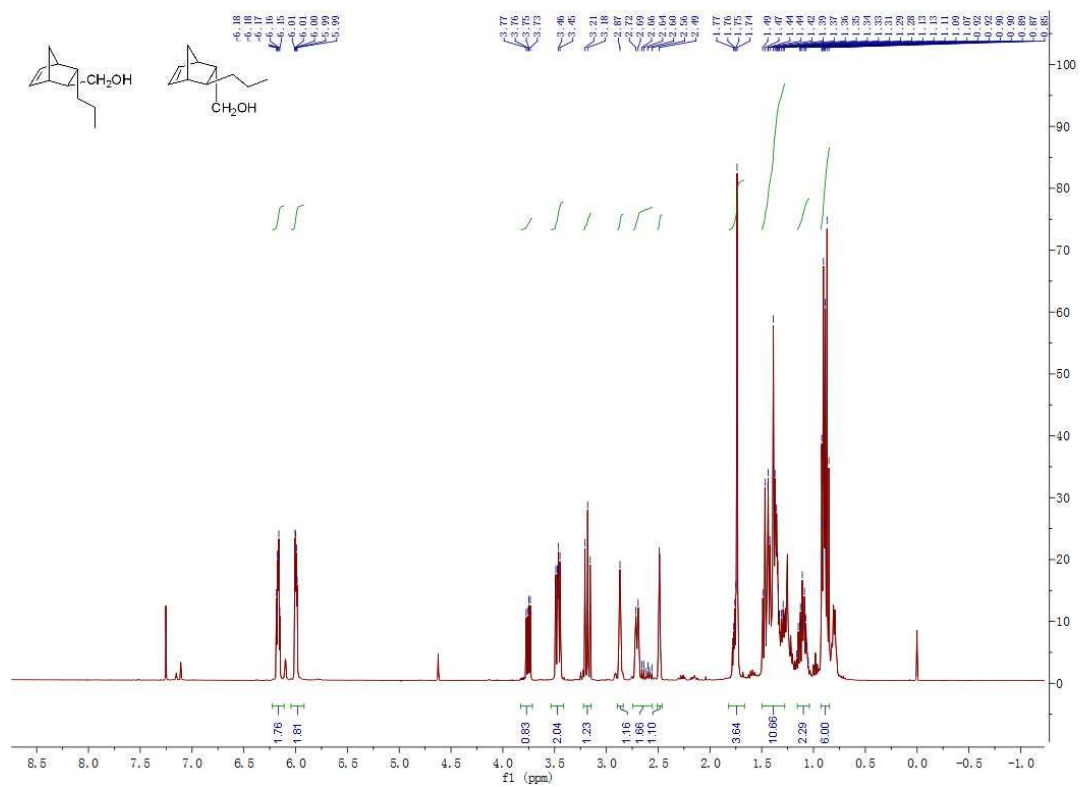

## HPLC spectra of products

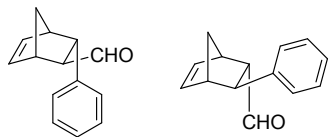

Chiralcel OJ-H, 225 nm, hexane/*i*-PrOH = 70/30, 0.8 mL/min

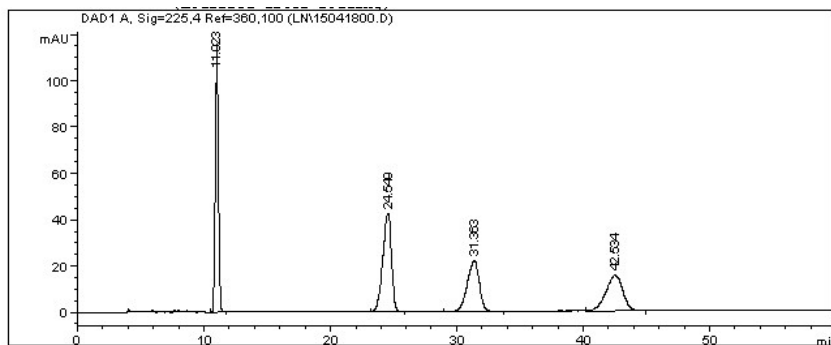

### Area Percent Report

Sorted By : Signal  
Multiplier : 1.0000  
Dilution : 1.0000  
Use Multiplier & Dilution Factor with ISTDs

Signal 1: DAD1 A, Sig=225,4 Ref=360,100

| Peak # | RetTime [min] | Type | Width [min] | Area [mAU*s] | Height [mAU] | Area %  |
|--------|---------------|------|-------------|--------------|--------------|---------|
| 1      | 11.023        | VV   | 0.2625      | 1968.80566   | 115.69119    | 29.0553 |
| 2      | 24.549        | VV   | 0.7113      | 1996.00671   | 42.23825     | 29.4568 |
| 3      | 31.363        | BB   | 1.0047      | 1405.90088   | 21.79185     | 20.7481 |
| 4      | 42.534        | BP   | 1.2930      | 1405.34131   | 15.33701     | 20.7398 |

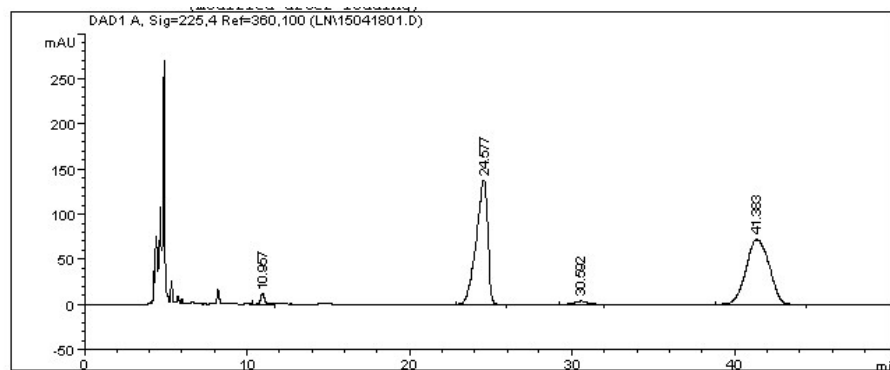

### Area Percent Report

Sorted By : Signal  
Multiplier : 1.0000  
Dilution : 1.0000  
Use Multiplier & Dilution Factor with ISTDs

Signal 1: DAD1 A, Sig=225,4 Ref=360,100

| Peak # | RetTime [min] | Type | Width [min] | Area [mAU*s] | Height [mAU] | Area %  |
|--------|---------------|------|-------------|--------------|--------------|---------|
| 1      | 10.957        | VV   | 0.2823      | 214.68037    | 11.47553     | 1.4916  |
| 2      | 24.577        | BB   | 0.7412      | 6815.63818   | 137.76959    | 47.3552 |
| 3      | 30.592        | BP   | 0.8364      | 222.85541    | 3.75500      | 1.5484  |
| 4      | 41.383        | BB   | 1.5953      | 7139.40479   | 71.84971     | 49.6048 |

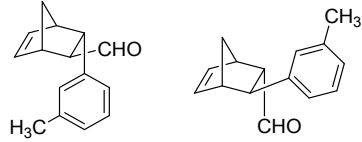

Chiralcel OJ-H, 210 nm, hexane/*i*-PrOH = 80/20, 0.8 mL/min

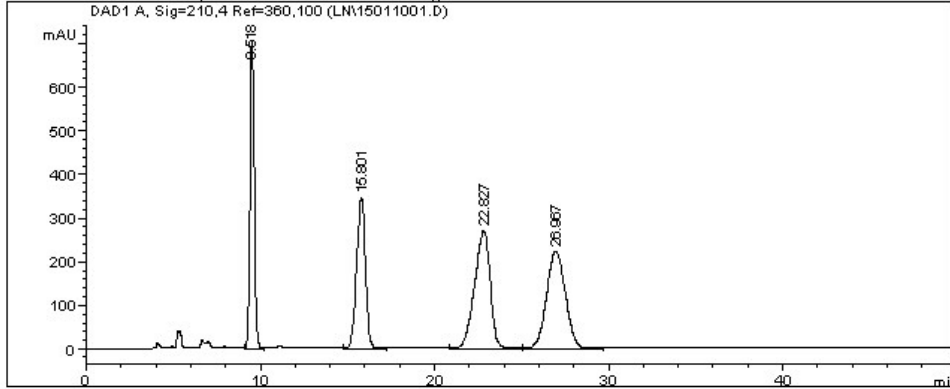

=====  
 Area Percent Report  
 =====

Sorted By : Signal  
 Multiplier : 1.0000  
 Dilution : 1.0000  
 Use Multiplier & Dilution Factor with ISTDs

Signal 1: DAD1 A, Sig=210,4 Ref=360,100

| Peak # | RetTime [min] | Tvbe | Width [min] | Area [mAU*s] | Height [mAU] | Area %  |
|--------|---------------|------|-------------|--------------|--------------|---------|
| 1      | 9.518         | VV   | 0.2710      | 1.22995e4    | 706.70410    | 20.8441 |
| 2      | 15.801        | VV   | 0.5665      | 1.25042e4    | 345.25137    | 21.1910 |
| 3      | 22.827        | VV   | 0.9905      | 1.71871e4    | 270.05005    | 29.1273 |
| 4      | 26.967        | VB   | 1.1874      | 1.70161e4    | 223.70053    | 28.8376 |

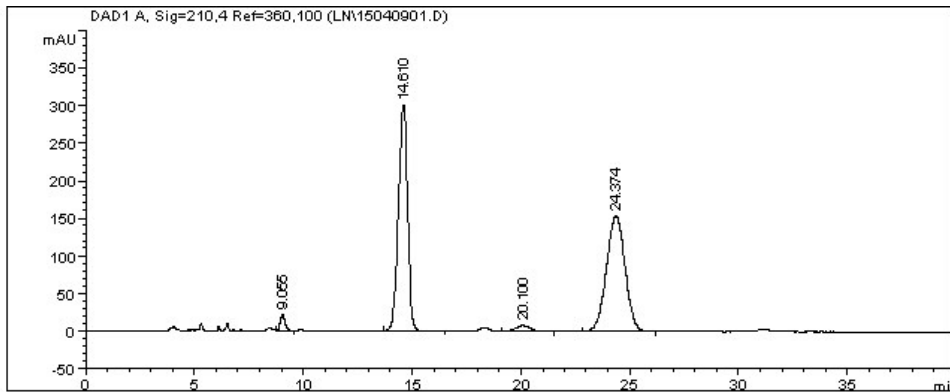

=====  
 Area Percent Report  
 =====

Sorted By : Signal  
 Multiplier : 1.0000  
 Dilution : 1.0000  
 Use Multiplier & Dilution Factor with ISTDs

Signal 1: DAD1 A, Sig=210,4 Ref=360,100

| Peak # | RetTime [min] | Tvbe | Width [min] | Area [mAU*s] | Height [mAU] | Area %  |
|--------|---------------|------|-------------|--------------|--------------|---------|
| 1      | 9.055         | VV   | 0.2440      | 351.77438    | 22.30621     | 1.8695  |
| 2      | 14.610        | VB   | 0.4636      | 8968.58398   | 301.03000    | 47.6636 |
| 3      | 20.100        | VP   | 0.7306      | 360.64194    | 7.75366      | 1.9166  |
| 4      | 24.374        | PV   | 0.9361      | 9135.41309   | 153.10680    | 48.5502 |

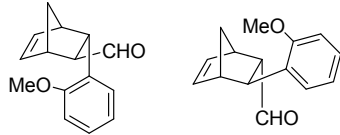

Chiralcel OJ-H, 210 nm, hexane/*i*-PrOH = 95/5, 0.6 mL/min

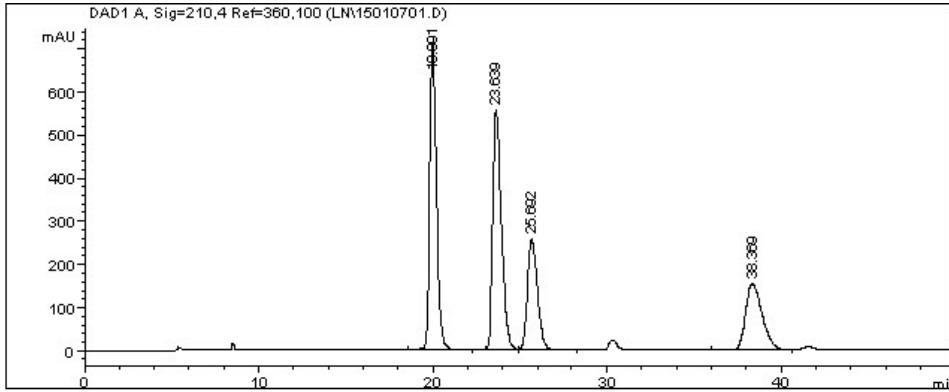

=====  
 Area Percent Report  
 =====

Sorted By : Signal  
 Multiplier : 1.0000  
 Dilution : 1.0000  
 Use Multiplier & Dilution Factor with ISTDs

Signal 1: DAD1 A, Sig=210,4 Ref=360,100

| Peak # | RetTime [min] | Type | Width [min] | Area [mAU*s] | Height [mAU] | Area %  |
|--------|---------------|------|-------------|--------------|--------------|---------|
| 1      | 19.991        | VV   | 0.4283      | 1.98084e4    | 712.51587    | 33.2035 |
| 2      | 23.639        | VV   | 0.5397      | 1.93996e4    | 555.16254    | 32.5182 |
| 3      | 25.692        | VB   | 0.6173      | 1.02672e4    | 257.44525    | 17.2102 |
| 4      | 38.369        | VV   | 1.0236      | 1.01824e4    | 153.16229    | 17.0680 |

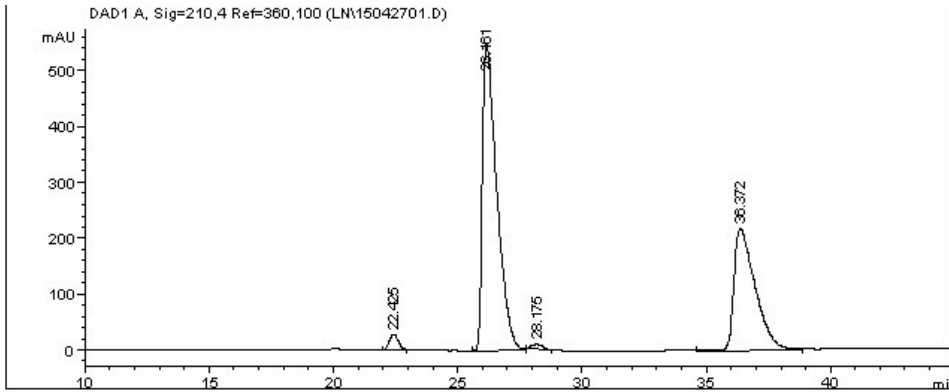

=====  
 Area Percent Report  
 =====

Sorted By : Signal  
 Multiplier : 1.0000  
 Dilution : 1.0000  
 Use Multiplier & Dilution Factor with ISTDs

Signal 1: DAD1 A, Sig=210,4 Ref=360,100

| Peak # | RetTime [min] | Type | Width [min] | Area [mAU*s] | Height [mAU] | Area %  |
|--------|---------------|------|-------------|--------------|--------------|---------|
| 1      | 22.425        | MM R | 0.4333      | 731.34241    | 28.12763     | 2.0153  |
| 2      | 26.161        | MM R | 0.6692      | 2.20911e4    | 550.18604    | 60.8742 |
| 3      | 28.175        | MM R | 0.5419      | 301.87396    | 9.28492      | 0.8318  |
| 4      | 36.372        | VV   | 0.8959      | 1.31654e4    | 219.44533    | 36.2787 |

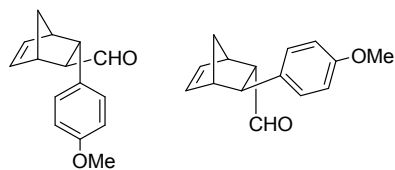

Chiralcel OJ-H, 210 nm, hexane/*i*-PrOH = 85/15, 20min → 80/20, 0.8 mL/min.

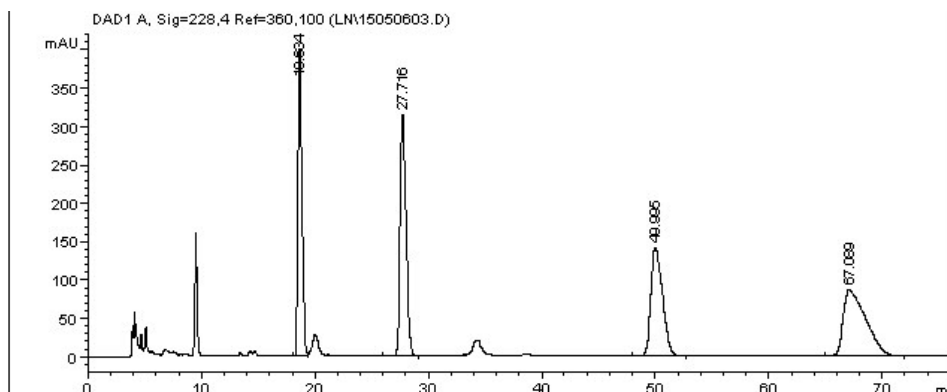

=====  
 Area Percent Report  
 =====

Sorted By : Signal  
 Multiplier : 1.0000  
 Dilution : 1.0000  
 Use Multiplier & Dilution Factor with ISTDs

Signal 1: DAD1 A, Sig=228,4 Ref=360,100

| Peak # | RetTime [min] | Type | Width [min] | Area [mAU*s] | Height [mAU] | Area %  |
|--------|---------------|------|-------------|--------------|--------------|---------|
| 1      | 18.634        | VV   | 0.3866      | 9953.17090   | 399.63657    | 23.0775 |
| 2      | 27.716        | VV   | 0.5811      | 1.16550e4    | 313.95361    | 27.0234 |
| 3      | 49.995        | BB   | 1.1162      | 9889.44824   | 139.98567    | 22.9298 |
| 4      | 67.089        | VB   | 1.8879      | 1.16317e4    | 85.24593     | 26.9693 |

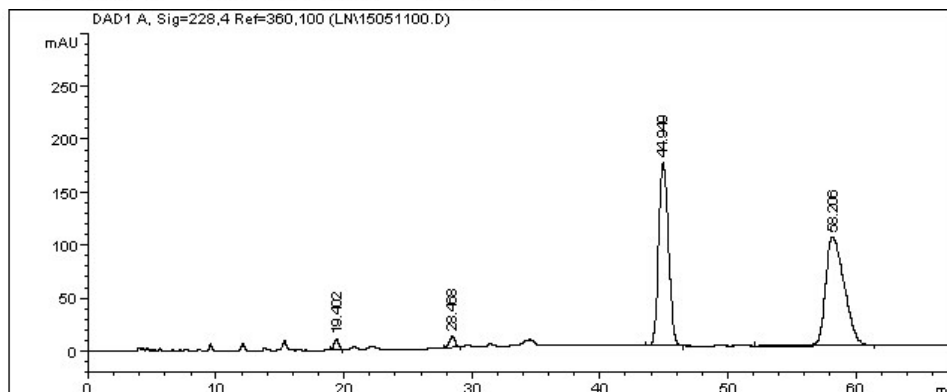

=====  
 Area Percent Report  
 =====

Sorted By : Signal  
 Multiplier : 1.0000  
 Dilution : 1.0000  
 Use Multiplier & Dilution Factor with ISTDs

Signal 1: DAD1 A, Sig=228,4 Ref=360,100

| Peak # | RetTime [min] | Type | Width [min] | Area [mAU*s] | Height [mAU] | Area %  |
|--------|---------------|------|-------------|--------------|--------------|---------|
| 1      | 19.402        | MM R | 0.4224      | 256.65192    | 10.12667     | 1.2846  |
| 2      | 28.468        | MM R | 0.5111      | 306.85623    | 10.00722     | 1.5359  |
| 3      | 44.949        | MM R | 0.8749      | 9089.86621   | 173.16736    | 45.4980 |
| 4      | 58.206        | VV   | 1.5232      | 1.03252e4    | 102.50018    | 51.6814 |

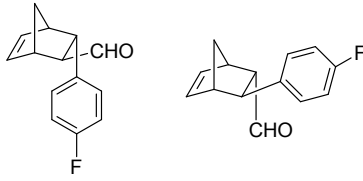

Chiralcel OJ-H, 210 nm, hexane/*i*-PrOH = 85/15, 0.8 mL/min

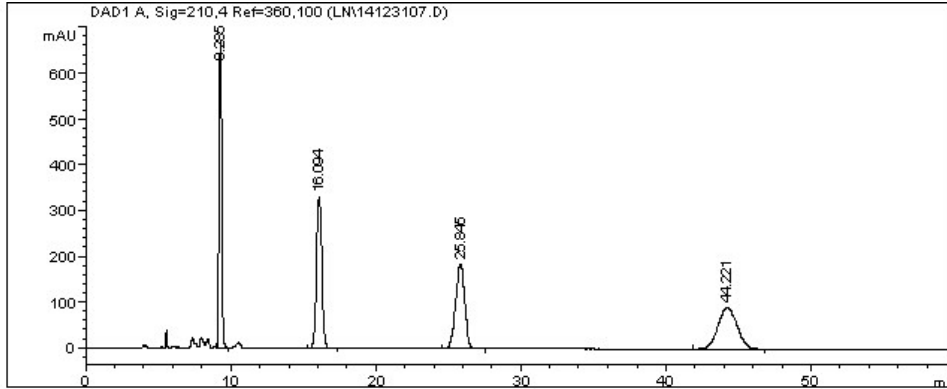

```

=====
                          Area Percent Report
=====
Sorted By      :      Signal
Multiplier    :      1.0000
Dilution      :      1.0000
Use Multiplier & Dilution Factor with ISTDs
  
```

Signal 1: DAD1 A, Sig=210,4 Ref=360,100

| Peak # | RetTime [min] | Tvbe | Width [min] | Area [mAU*s] | Height [mAU] | Area %  |
|--------|---------------|------|-------------|--------------|--------------|---------|
| 1      | 9.285         | VV   | 0.1906      | 8183.82080   | 669.33771    | 24.7882 |
| 2      | 16.094        | VV   | 0.3942      | 8334.52051   | 330.55728    | 25.2446 |
| 3      | 25.845        | BB   | 0.6977      | 8136.25635   | 183.34978    | 24.6441 |
| 4      | 44.221        | VV   | 1.4420      | 8360.44531   | 91.15469     | 25.3231 |

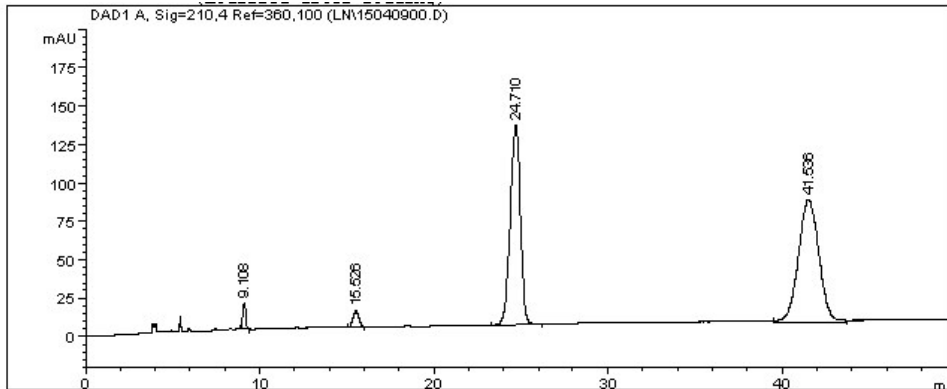

```

=====
                          Area Percent Report
=====
Sorted By      :      Signal
Multiplier    :      1.0000
Dilution      :      1.0000
Use Multiplier & Dilution Factor with ISTDs
  
```

Signal 1: DAD1 A, Sig=210,4 Ref=360,100

| Peak # | RetTime [min] | Tvbe | Width [min] | Area [mAU*s] | Height [mAU] | Area %  |
|--------|---------------|------|-------------|--------------|--------------|---------|
| 1      | 9.108         | MM R | 0.1913      | 188.97432    | 16.45993     | 1.5491  |
| 2      | 15.526        | MM R | 0.3932      | 255.14880    | 10.81443     | 2.0915  |
| 3      | 24.710        | MM R | 0.6816      | 5314.94873   | 129.96785    | 43.5675 |
| 4      | 41.536        | MM R | 1.3550      | 6440.27539   | 79.21528     | 52.7920 |

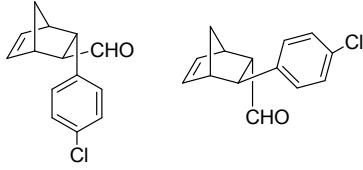

Chiralcel OJ-H, 210 nm, hexane/*i*-PrOH = 90/10, 10min → 80/20, 0.6 mL/min.

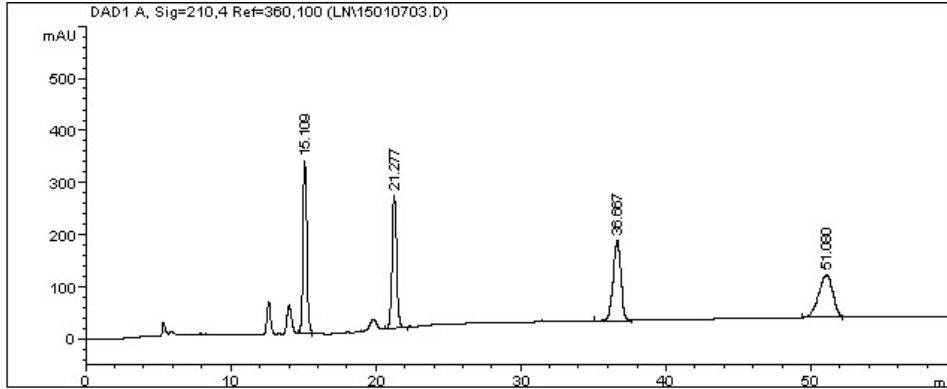

```

=====
                          Area Percent Report
=====
Sorted By      :      Signal
Multiplier     :      1.0000
Dilution      :      1.0000
Use Multiplier & Dilution Factor with ISTDs
  
```

Signal 1: DAD1 A, Sig=210,4 Ref=360,100

| Peak # | RetTime [min] | Type | Width [min] | Area [mAU*s] | Height [mAU] | Area %  |
|--------|---------------|------|-------------|--------------|--------------|---------|
| 1      | 15.109        | MM R | 0.3096      | 6140.45117   | 330.60858    | 26.5849 |
| 2      | 21.277        | MM R | 0.3656      | 5582.66064   | 254.47655    | 24.1700 |
| 3      | 36.667        | MM R | 0.6422      | 5989.88770   | 155.44403    | 25.9330 |
| 4      | 51.080        | MM R | 1.1178      | 5384.50879   | 80.28416     | 23.3121 |

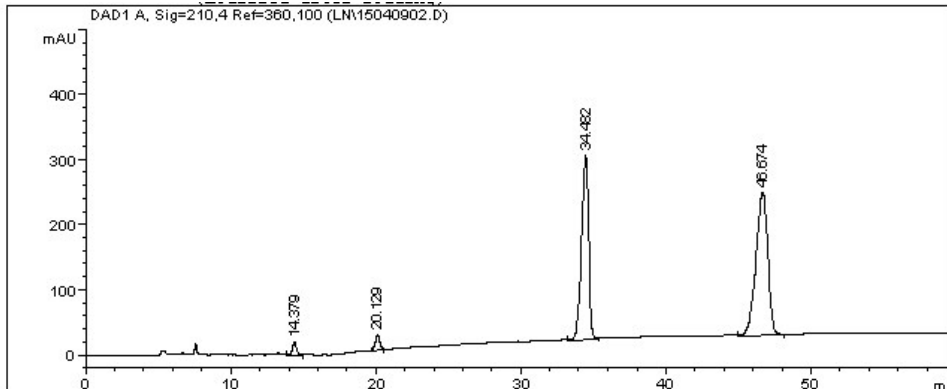

```

=====
                          Area Percent Report
=====
Sorted By      :      Signal
Multiplier     :      1.0000
Dilution      :      1.0000
Use Multiplier & Dilution Factor with ISTDs
  
```

Signal 1: DAD1 A, Sig=210,4 Ref=360,100

| Peak # | RetTime [min] | Type | Width [min] | Area [mAU*s] | Height [mAU] | Area %  |
|--------|---------------|------|-------------|--------------|--------------|---------|
| 1      | 14.379        | VV   | 0.2798      | 376.92023    | 20.76600     | 1.6347  |
| 2      | 20.129        | MM R | 0.3552      | 530.77844    | 24.90523     | 2.3020  |
| 3      | 34.482        | MM R | 0.5667      | 9638.06348   | 283.47128    | 41.8008 |
| 4      | 46.674        | MM R | 0.9564      | 1.25113e4    | 218.03403    | 54.2624 |



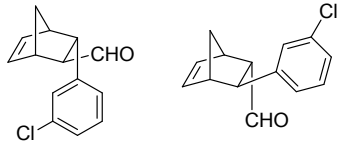

Chiralcel OJ-H, 210 nm, hexane/*i*-PrOH = 99.9/0.1, 20min → 98/2, 0.6 mL/min.

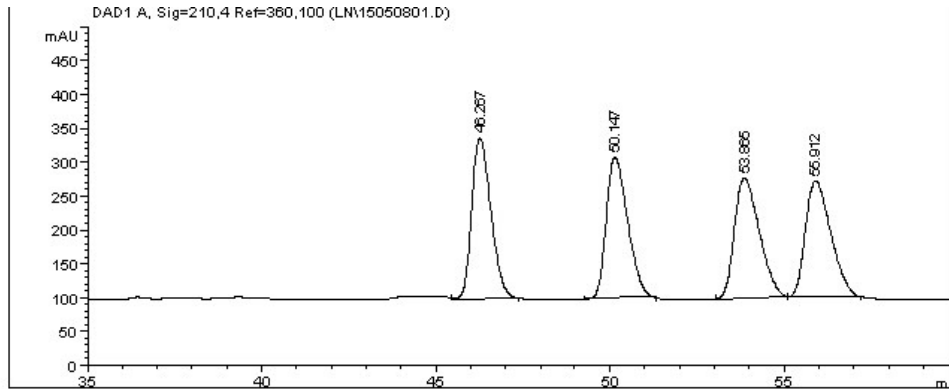

```

=====
                          Area Percent Report
=====
Sorted By      :      Signal
Multiplier     :      1.0000
Dilution      :      1.0000
Use Multiplier & Dilution Factor with ISTDs
  
```

Signal 1: DAD1 A, Sig=210,4 Ref=360,100

| Peak # | RetTime [min] | Type | Width [min] | Area [mAU*s] | Height [mAU] | Area %  |
|--------|---------------|------|-------------|--------------|--------------|---------|
| 1      | 46.267        | MM R | 0.6309      | 8963.94336   | 236.82074    | 25.4444 |
| 2      | 50.147        | MM R | 0.7065      | 8758.95313   | 206.61642    | 24.8626 |
| 3      | 53.865        | MM R | 0.8259      | 8818.11426   | 177.96025    | 25.0305 |
| 4      | 55.912        | MM R | 0.8458      | 8688.49121   | 171.21066    | 24.6625 |

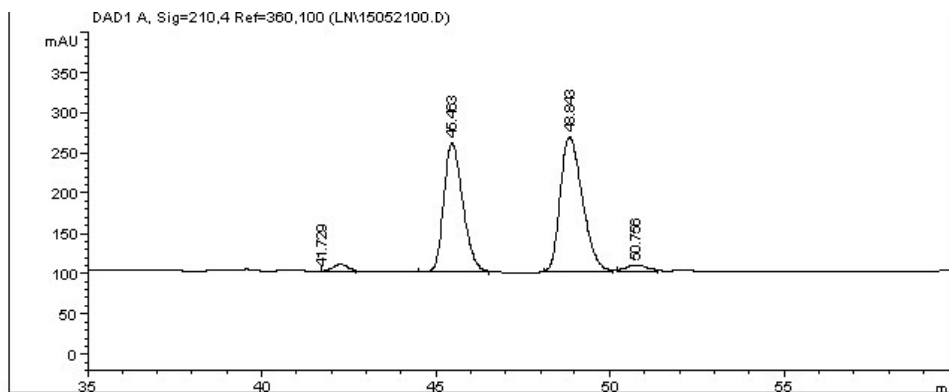

```

=====
                          Area Percent Report
=====
Sorted By      :      Signal
Multiplier     :      1.0000
Dilution      :      1.0000
Use Multiplier & Dilution Factor with ISTDs
  
```

Signal 1: DAD1 A, Sig=210,4 Ref=360,100

| Peak # | RetTime [min] | Type | Width [min] | Area [mAU*s] | Height [mAU] | Area %  |
|--------|---------------|------|-------------|--------------|--------------|---------|
| 1      | 41.729        | MM R | 0.4855      | 238.03937    | 8.47672e-2   | 1.7144  |
| 2      | 45.463        | MM R | 0.6255      | 5970.71387   | 159.10014    | 43.0013 |
| 3      | 48.843        | MM R | 0.7361      | 7372.66699   | 166.93918    | 53.0982 |
| 4      | 50.756        | MM R | 0.6871      | 303.54443    | 7.36335      | 2.1861  |

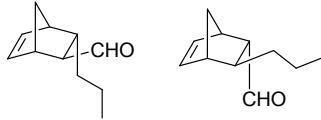

Chiralcel OD-H, 210 nm, hexane/*i*-PrOH = 99.5/0.5, 0.6 mL/min.

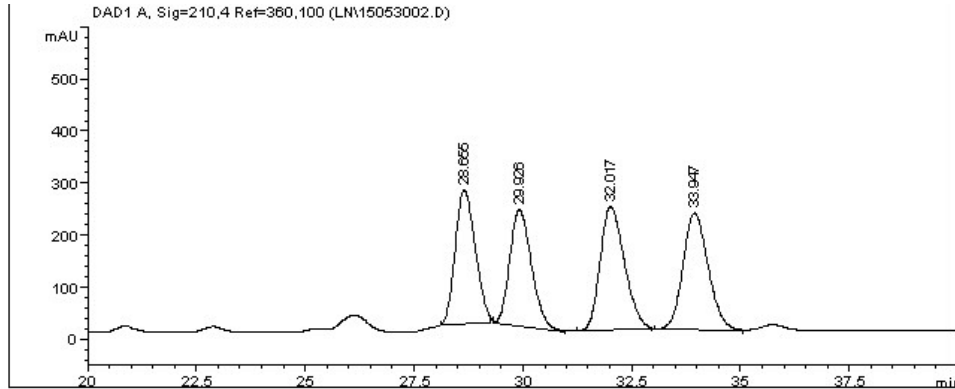

```

=====
                          Area Percent Report
=====
Sorted By      :      Simal
Multiplier     :      1.0000
Dilution      :      1.0000
Use Multiplier & Dilution Factor with ISTDs
  
```

Signal 1: DAD1 A, Sig=210,4 Ref=360,100

| Peak # | RetTime [min] | Type | Width [min] | Area [mAU*s] | Height [mAU] | Area %  |
|--------|---------------|------|-------------|--------------|--------------|---------|
| 1      | 28.655        | MM R | 0.5343      | 8225.18262   | 256.58316    | 24.1793 |
| 2      | 29.926        | MM R | 0.5821      | 7791.08008   | 223.05606    | 22.9031 |
| 3      | 32.017        | MM R | 0.6422      | 9095.52539   | 236.06430    | 26.7378 |
| 4      | 33.947        | MM R | 0.6647      | 8905.73047   | 223.31462    | 26.1798 |

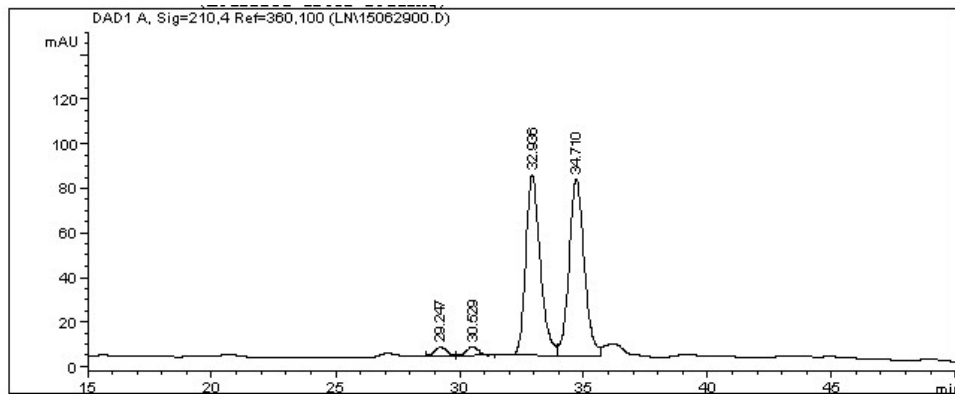

```

=====
                          Area Percent Report
=====
Sorted By      :      Simal
Multiplier     :      1.0000
Dilution      :      1.0000
Use Multiplier & Dilution Factor with ISTDs
  
```

Signal 1: DAD1 A, Sig=210,4 Ref=360,100

| Peak # | RetTime [min] | Type | Width [min] | Area [mAU*s] | Height [mAU] | Area %  |
|--------|---------------|------|-------------|--------------|--------------|---------|
| 1      | 29.247        | BV   | 0.5056      | 129.28737    | 3.99423      | 1.8700  |
| 2      | 30.529        | VB   | 0.5149      | 128.85657    | 3.96733      | 1.8637  |
| 3      | 32.936        | BV   | 0.6155      | 3263.65039   | 80.75188     | 47.2040 |
| 4      | 34.710        | VV   | 0.6545      | 3392.12691   | 79.38467     | 49.0623 |

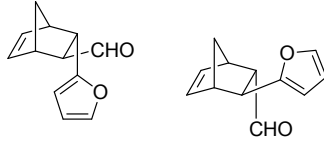

Chiralcel OJ-H, 220 nm, hexane/*i*-PrOH = 90/10, 0.8 mL/min

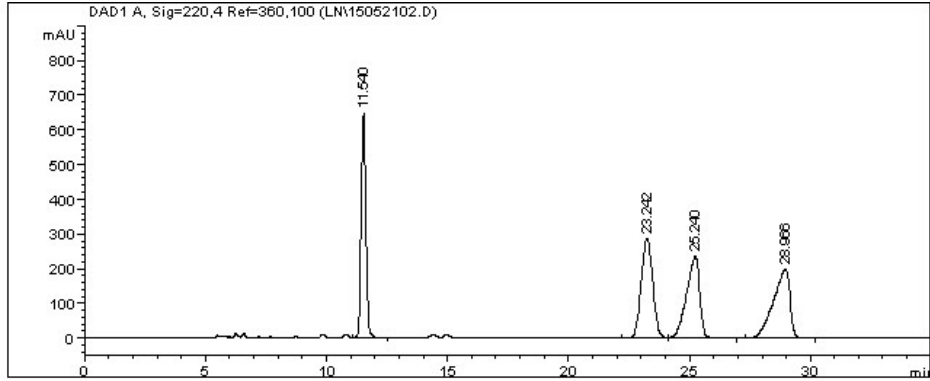

=====  
 Area Percent Report  
 =====

Sorted By : Signal  
 Multiplier : 1.0000  
 Dilution : 1.0000  
 Use Multiplier & Dilution Factor with ISTDs

Signal 1: DAD1 A, Sig=220,4 Ref=360,100

| Peak # | RetTime [min] | Type | Width [min] | Area [mAU*s] | Height [mAU] | Area %  |
|--------|---------------|------|-------------|--------------|--------------|---------|
| 1      | 11.540        | VV   | 0.2162      | 8921.57324   | 649.54095    | 24.1866 |
| 2      | 23.242        | VV   | 0.5227      | 9497.28711   | 286.53726    | 25.7473 |
| 3      | 25.240        | VB   | 0.5769      | 8957.12598   | 234.90878    | 24.2830 |
| 4      | 28.966        | BV   | 0.7132      | 9510.47949   | 199.12978    | 25.7831 |

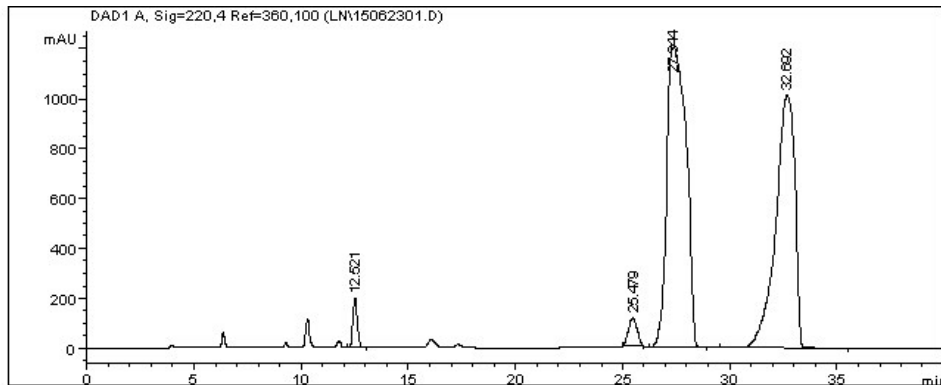

=====  
 Area Percent Report  
 =====

Sorted By : Signal  
 Multiplier : 1.0000  
 Dilution : 1.0000  
 Use Multiplier & Dilution Factor with ISTDs

Signal 1: DAD1 A, Sig=220,4 Ref=360,100

| Peak # | RetTime [min] | Type | Width [min] | Area [mAU*s] | Height [mAU] | Area %  |
|--------|---------------|------|-------------|--------------|--------------|---------|
| 1      | 12.521        | MM R | 0.2413      | 2888.04102   | 199.46106    | 1.9791  |
| 2      | 25.479        | MM R | 0.4782      | 3245.23193   | 113.09546    | 2.2239  |
| 3      | 27.344        | MM R | 0.9322      | 7.60324e4    | 1213.88928   | 52.1026 |
| 4      | 32.692        | MM R | 1.6963      | 6.37626e4    | 1014.15051   | 43.6945 |

## HPLC spectra for Table 2 in manuscript

Table 2, entry 1:

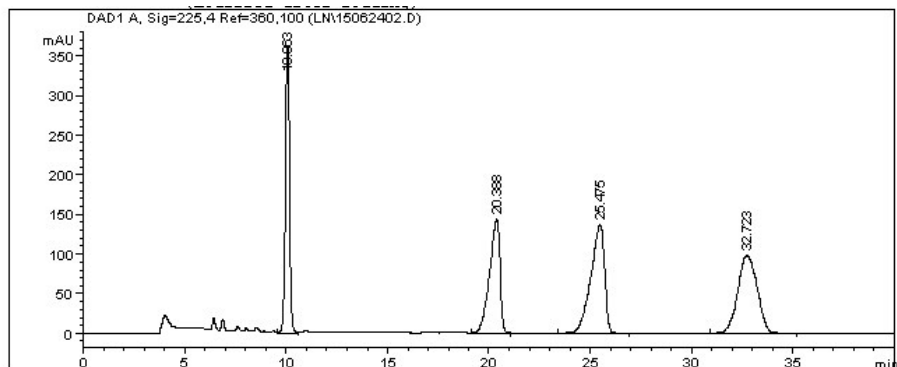

```

=====
                          Area Percent Report
=====
Sorted By      :      Signal
Multiplier    :      1.0000
Dilution      :      1.0000
Use Multiplier & Dilution Factor with ISTDs

Signal 1: DAD1 A, Sig=225,4 Ref=360,100

Peak RetTime  Type  Width   Area    Height   Area
# [min]       [min] [min] [mAU*s] [mAU]    %
-----
1  10.063  VV   0.2222 5162.26758 362.43411 22.0111
2  20.388  VV   0.5418 5223.04736 144.48164 22.2703
3  25.475  VB   0.7153 6511.12402 136.79135 27.7624
4  32.723  VV   1.0680 6556.56396  98.06458 27.9562
  
```

Table 2, entry 2:

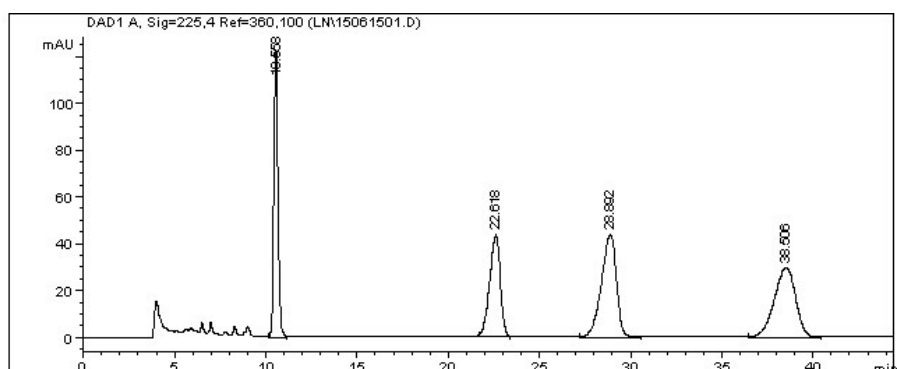

```

=====
                          Area Percent Report
=====
Sorted By      :      Signal
Multiplier    :      1.0000
Dilution      :      1.0000
Use Multiplier & Dilution Factor with ISTDs

Signal 1: DAD1 A, Sig=225,4 Ref=360,100

Peak RetTime  Type  Width   Area    Height   Area
# [min]       [min] [min] [mAU*s] [mAU]    %
-----
1  10.558  VV   0.2506 1962.42896 122.69833 22.5436
2  22.618  HM R  0.6742 1752.06702  43.31303 20.1271
3  28.892  VV   0.8815 2552.80713  43.95701 29.3257
4  38.506  VV   1.0006 2437.71973  29.73178 28.0036
  
```

Table 2, entry 3:

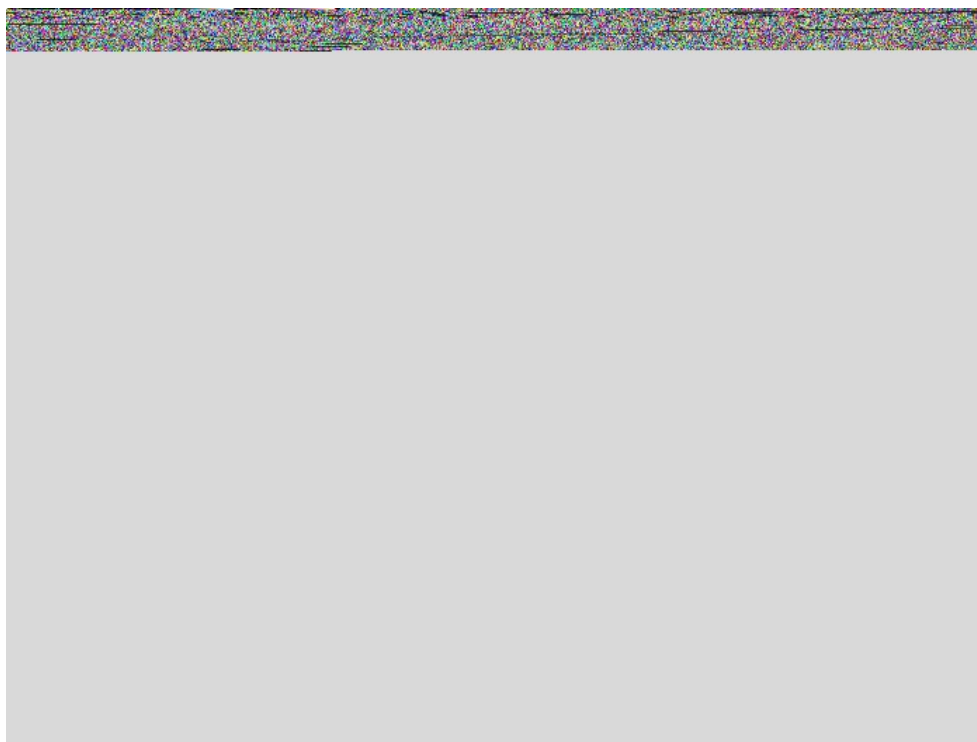

Table 2, entry 4:

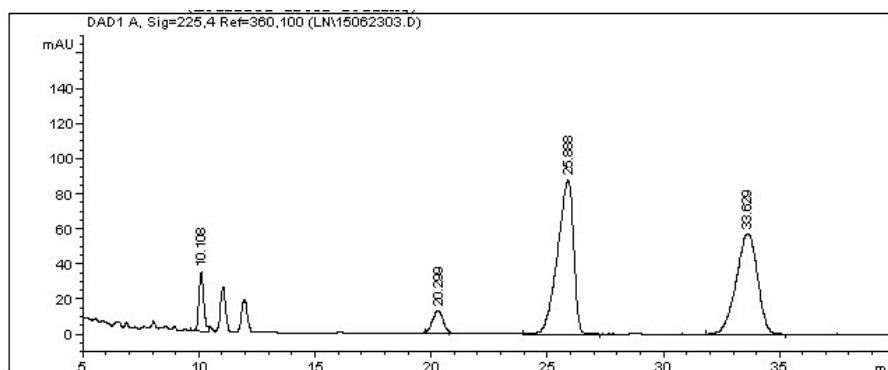

=====  
 Area Percent Report  
 =====

Sorted By : Signal  
 Multiplier : 1.0000  
 Dilution : 1.0000  
 Use Multiplier & Dilution Factor with ISTDs

Signal 1: DAD1 A, Sig=225,4 Ref=360,100

| Peak # | RetTime [min] | Type | Width [min] | Area [mAU*s] | Height [mAU] | Area %  |
|--------|---------------|------|-------------|--------------|--------------|---------|
| 1      | 10.108        | MM R | 0.2392      | 483.60764    | 33.69835     | 5.5173  |
| 2      | 20.299        | MM R | 0.5269      | 402.28970    | 12.72617     | 4.5896  |
| 3      | 25.888        | BV   | 0.7370      | 4220.09766   | 87.76259     | 48.1457 |
| 4      | 33.629        | VV   | 0.9740      | 3659.27051   | 57.22977     | 41.7474 |

Table 2, entry 5:

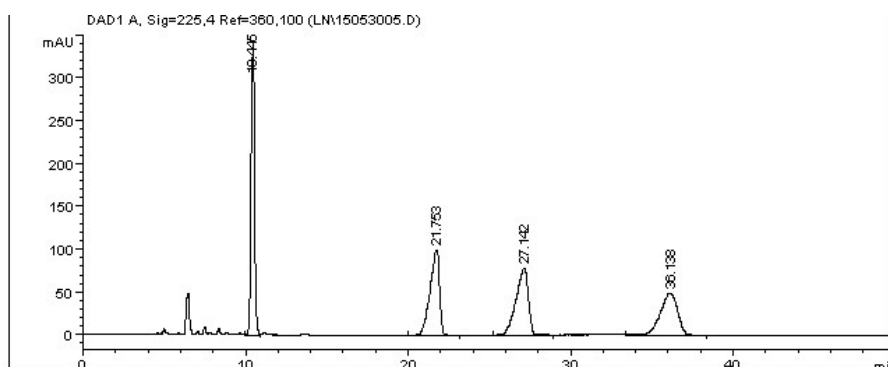

=====  
 Area Percent Report  
 =====

Sorted By : Signal  
 Multiplier : 1.0000  
 Dilution : 1.0000  
 Use Multiplier & Dilution Factor with ISTDs

Signal 1: DAD1 A, Sig=225,4 Ref=360,100

| Peak # | RetTime [min] | Type | Width [min] | Area [mAU*s] | Height [mAU] | Area %  |
|--------|---------------|------|-------------|--------------|--------------|---------|
| 1      | 10.445        | VV   | 0.2374      | 5094.49902   | 335.07294    | 30.1132 |
| 2      | 21.753        | BB   | 0.6162      | 4081.69849   | 100.00665    | 24.1266 |
| 3      | 27.142        | BB   | 0.8016      | 4134.53857   | 77.60605     | 24.4389 |
| 4      | 36.138        | BV   | 1.1429      | 3607.09668   | 48.99744     | 21.3213 |

Table 2, entry 6:

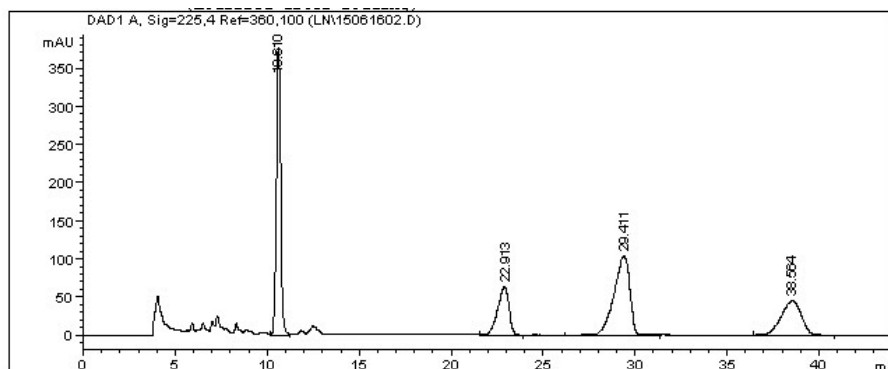

=====  
 Area Percent Report  
 =====

Sorted By : Signal  
 Multiplier : 1.0000  
 Dilution : 1.0000  
 Use Multiplier & Dilution Factor with ISTDs

Signal 1: DAD1 A, Sig=225,4 Ref=360,100

| Peak # | RetTime [min] | Type | Width [min] | Area [mAU*s] | Height [mAU] | Area %  |
|--------|---------------|------|-------------|--------------|--------------|---------|
| 1      | 10.610        | VV   | 0.2567      | 6216.33398   | 376.27350    | 33.5594 |
| 2      | 22.913        | VV   | 0.6635      | 2701.79761   | 63.10043     | 14.5859 |
| 3      | 29.411        | VB   | 0.9136      | 6188.60596   | 104.09145    | 33.4097 |
| 4      | 38.564        | BP   | 1.2104      | 3416.62183   | 44.76526     | 18.4449 |

Table 2, entry 7:

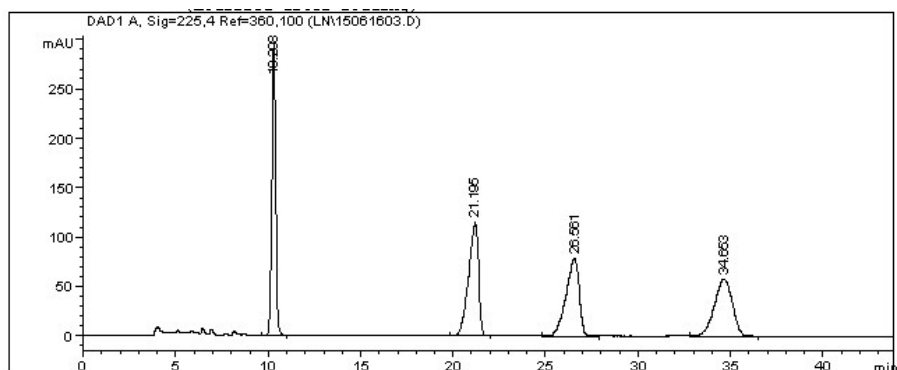

=====  
 Area Percent Report  
 =====

Sorted By : Signal  
 Multiplier : 1.0000  
 Dilution : 1.0000  
 Use Multiplier & Dilution Factor with ISTDs

Signal 1: DAD1 A, Sig=225,4 Ref=360,100

| Peak # | RetTime [min] | Type | Width [min] | Area [mAU*s] | Height [mAU] | Area %  |
|--------|---------------|------|-------------|--------------|--------------|---------|
| 1      | 10.298        | VV   | 0.2299      | 4332.47314   | 290.60303    | 26.2605 |
| 2      | 21.195        | VV   | 0.5736      | 4312.05127   | 114.95724    | 26.1368 |
| 3      | 26.561        | VV   | 0.7553      | 3913.38818   | 78.81629     | 23.7203 |
| 4      | 34.653        | VB   | 1.0503      | 3940.11768   | 57.87358     | 23.8824 |

HPLC spectra for Figure1 in manuscript

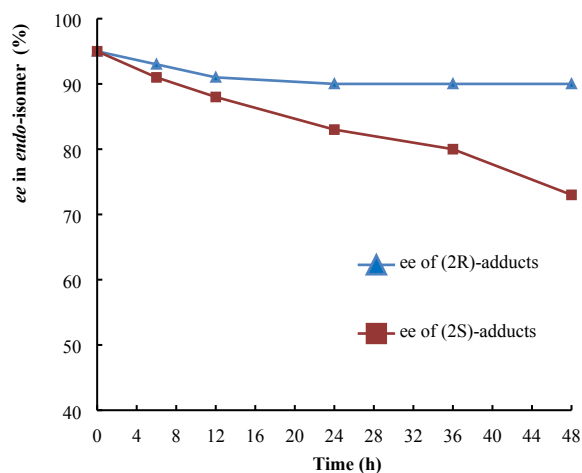

**Fig.1** Different reversion reactivity between (2S)-adducts and (2R)-adducts in CH<sub>3</sub>CN-H<sub>2</sub>O system: (2S)-adducts (95% ee in *endo*-isomers) and the (2R)-adducts (95% ee in *endo*-isomers), 20 mol% **1a**, 50 mol% TFA, CH<sub>3</sub>CN (1.9 mL), H<sub>2</sub>O (0.1 mL), 40 °C, 48h.

T= 0 h , ee values in 2R-endo-isomer : 95 %

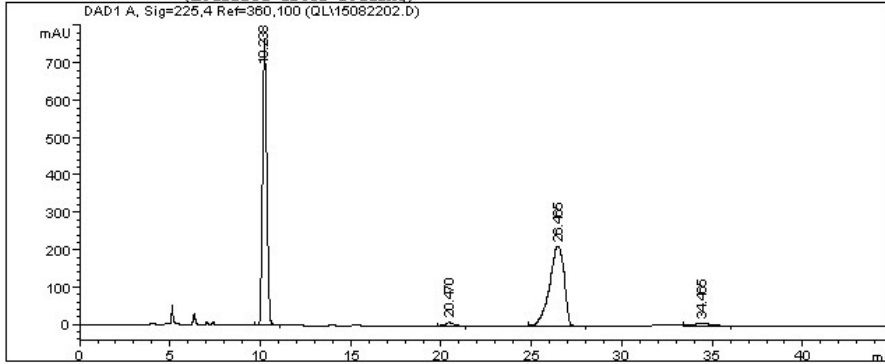

=====  
 Area Percent Report  
 =====

Sorted By : Signal  
 Multiplier : 1.0000  
 Dilution : 1.0000  
 Use Multiplier & Dilution Factor with ISTDs

Signal 1: DAD1 A, Sig=225,4 Ref=360,100

| Peak # | RetTime [min] | Tvpe | Width [min] | Area [mAU*s] | Height [mAU] | Area %  |
|--------|---------------|------|-------------|--------------|--------------|---------|
| 1      | 10.238        | BV   | 0.2529      | 1.24207e4    | 767.14288    | 49.5628 |
| 2      | 20.470        | PB   | 0.5190      | 305.03113    | 9.19471      | 1.2172  |
| 3      | 26.465        | BB   | 0.8732      | 1.18672e4    | 213.24927    | 47.3541 |
| 4      | 34.465        | VP   | 0.9104      | 467.61353    | 7.08101      | 1.8659  |

T= 6 h , ee values in 2R-endo-isomer : 93%

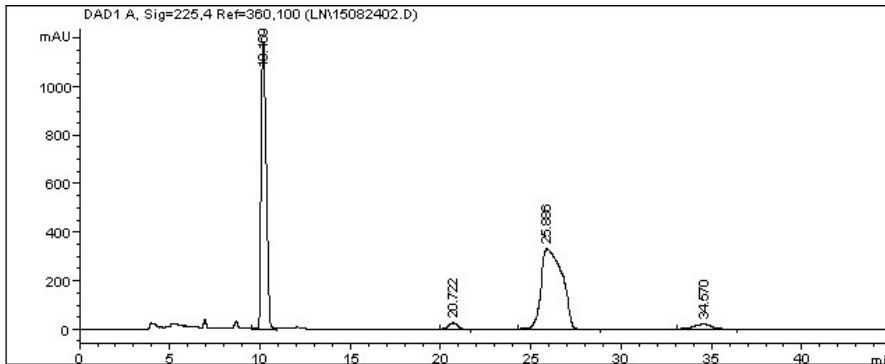

=====  
 Area Percent Report  
 =====

Sorted By : Signal  
 Multiplier : 1.0000  
 Dilution : 1.0000  
 Use Multiplier & Dilution Factor with ISTDs

Signal 1: DAD1 A, Sig=225,4 Ref=360,100

| Peak # | RetTime [min] | Tvpe | Width [min] | Area [mAU*s] | Height [mAU] | Area %  |
|--------|---------------|------|-------------|--------------|--------------|---------|
| 1      | 10.169        | BV   | 0.3168      | 2.27853e4    | 1182.68140   | 43.9224 |
| 2      | 20.722        | BB   | 0.5243      | 890.17065    | 26.47439     | 1.7159  |
| 3      | 25.886        | BP   | 1.3901      | 2.68358e4    | 330.92719    | 51.7303 |
| 4      | 34.570        | BP   | 1.0873      | 1365.08118   | 19.43820     | 2.6314  |



T= 12 h , ee values in 2R-endo-isomer : 91%

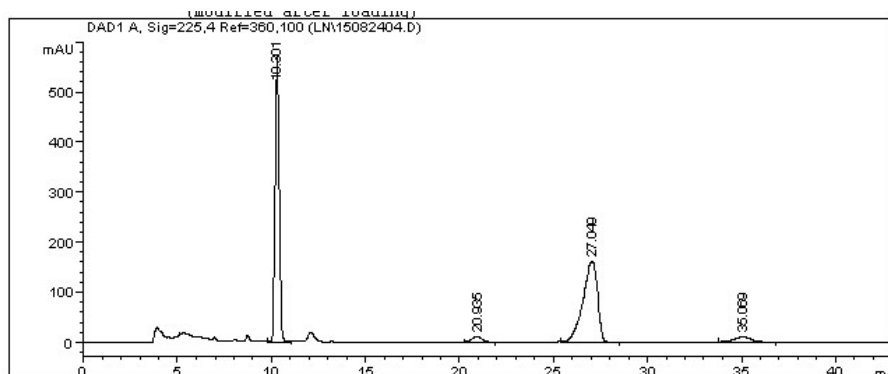

=====  
Area Percent Report  
=====

Sorted By : Signal  
Multiplier : 1.0000  
Dilution : 1.0000  
Use Multiplier & Dilution Factor with ISTDs

Signal 1: DAD1 A, Sig=225,4 Ref=360,100

| Peak # | RetTime [min] | Type | Width [min] | Area [mAU*s] | Height [mAU] | Area %  |
|--------|---------------|------|-------------|--------------|--------------|---------|
| 1      | 10.301        | BB   | 0.2405      | 8873.85937   | 573.49976    | 47.7755 |
| 2      | 20.935        | BB   | 0.5315      | 422.69302    | 12.22247     | 2.2757  |
| 3      | 27.049        | BB   | 0.8233      | 8645.78516   | 160.79494    | 46.5476 |
| 4      | 35.069        | BP   | 0.9498      | 631.74329    | 9.57410      | 3.4012  |

T= 24 h , ee values in 2R-endo-isomer : 90%

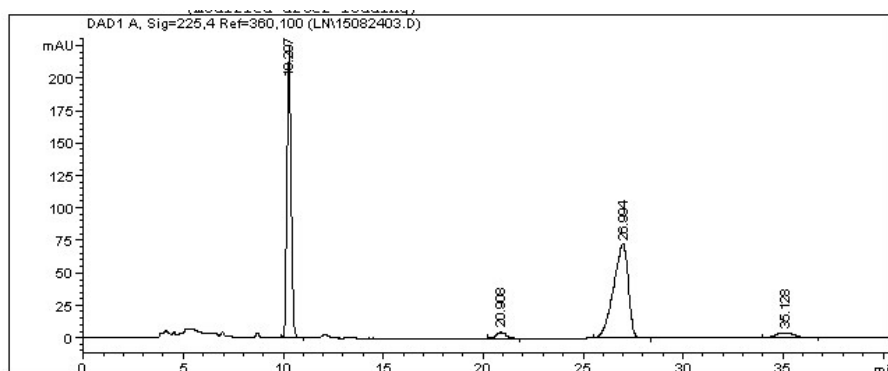

=====  
Area Percent Report  
=====

Sorted By : Signal  
Multiplier : 1.0000  
Dilution : 1.0000  
Use Multiplier & Dilution Factor with ISTDs

Signal 1: DAD1 A, Sig=225,4 Ref=360,100

| Peak # | RetTime [min] | Type | Width [min] | Area [mAU*s] | Height [mAU] | Area %  |
|--------|---------------|------|-------------|--------------|--------------|---------|
| 1      | 10.297        | BB   | 0.2319      | 3252.47974   | 220.79329    | 43.8346 |
| 2      | 20.908        | BP   | 0.4988      | 170.93530    | 4.90281      | 2.3037  |
| 3      | 26.994        | BB   | 0.7940      | 3732.11963   | 72.33378     | 50.2988 |
| 4      | 35.128        | BB   | 0.8292      | 264.36237    | 4.09474      | 3.5629  |

T= 36 h , ee values in 2R-endo-isomer : 90%

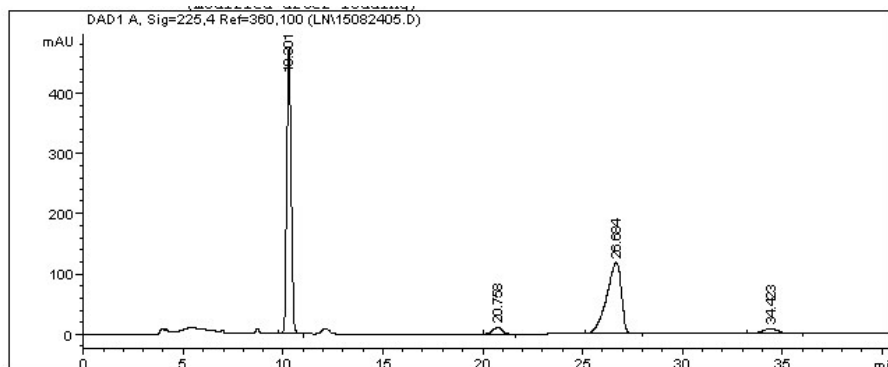

=====  
 Area Percent Report  
 =====

Sorted By : Signal  
 Multiplier : 1.0000  
 Dilution : 1.0000  
 Use Multiplier & Dilution Factor with ISTDs

Signal 1: DAD1 A, Sig=225,4 Ref=360,100

| Peak # | RetTime [min] | Type | Width [min] | Area [mAU*s] | Height [mAU] | Area %  |
|--------|---------------|------|-------------|--------------|--------------|---------|
| 1      | 10.301        | BB   | 0.2321      | 7176.20117   | 475.54129    | 51.2866 |
| 2      | 20.758        | BB   | 0.5245      | 392.94409    | 11.67997     | 2.8083  |
| 3      | 26.684        | BB   | 0.7718      | 5955.08936   | 117.38891    | 42.5596 |
| 4      | 34.423        | BB   | 0.9683      | 468.12747    | 7.45820      | 3.3456  |

T= 48 h , ee values in 2R-endo-isomer : 90%

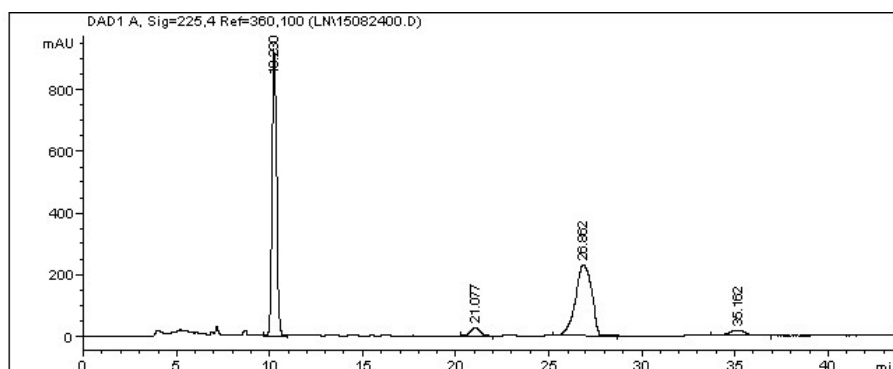

=====  
 Area Percent Report  
 =====

Sorted By : Signal  
 Multiplier : 1.0000  
 Dilution : 1.0000  
 Use Multiplier & Dilution Factor with ISTDs

Signal 1: DAD1 A, Sig=225,4 Ref=360,100

| Peak # | RetTime [min] | Type | Width [min] | Area [mAU*s] | Height [mAU] | Area %  |
|--------|---------------|------|-------------|--------------|--------------|---------|
| 1      | 10.230        | BV   | 0.2775      | 1.60925e4    | 931.71936    | 50.1626 |
| 2      | 21.077        | BP   | 0.5509      | 913.76117    | 26.20192     | 2.8483  |
| 3      | 26.862        | BB   | 0.9773      | 1.39495e4    | 230.76067    | 43.4825 |
| 4      | 35.162        | BP   | 1.0470      | 1124.94214   | 16.59127     | 3.5066  |

T= 0 h , ee values in 2S-endo-isomer : 95%

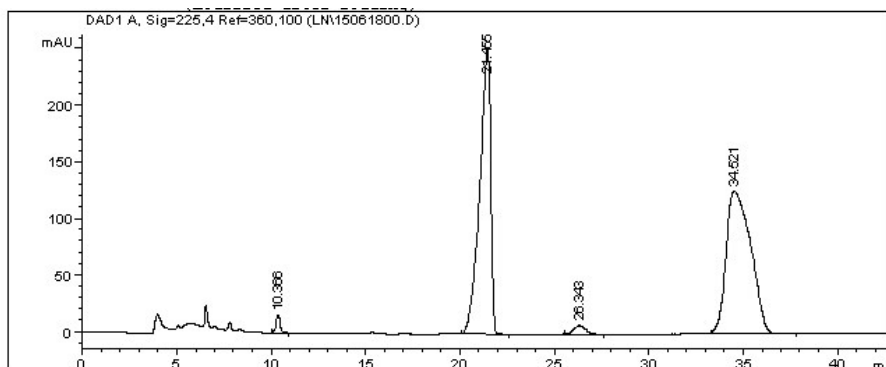

=====  
 Area Percent Report  
 =====

Sorted By : Signal  
 Multiplier : 1.0000  
 Dilution : 1.0000  
 Use Multiplier & Dilution Factor with ISTDs

Signal 1: DAD1 A, Sig=225,4 Ref=360,100

| Peak # | RetTime [min] | Type | Width [min] | Area [mAU*s] | Height [mAU] | Area %  |
|--------|---------------|------|-------------|--------------|--------------|---------|
| 1      | 10.366        | BP   | 0.2378      | 251.03027    | 16.11035     | 1.1263  |
| 2      | 21.455        | PP   | 0.6014      | 1.02592e4    | 252.83867    | 46.0290 |
| 3      | 26.343        | BB   | 0.7175      | 348.31900    | 7.67479      | 1.5628  |
| 4      | 34.521        | BP   | 1.5473      | 1.14299e4    | 126.35559    | 51.2819 |

T= 6 h , ee values in 2S-endo-isomer : 91%

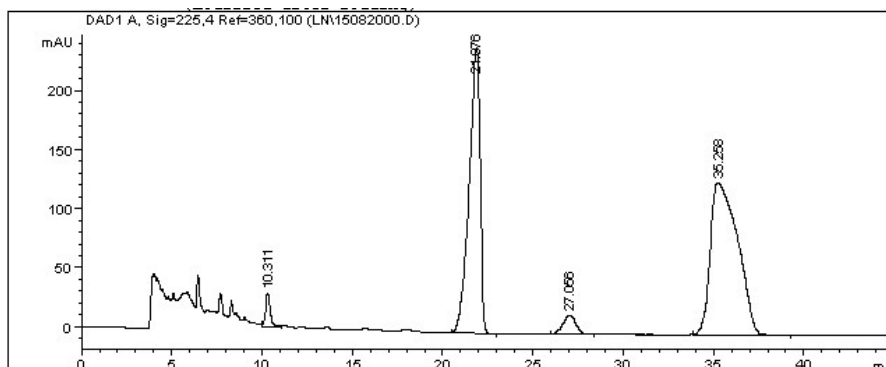

=====  
 Area Percent Report  
 =====

Sorted By : Signal  
 Multiplier : 1.0000  
 Dilution : 1.0000  
 Use Multiplier & Dilution Factor with ISTDs

Signal 1: DAD1 A, Sig=225,4 Ref=360,100

| Peak # | RetTime [min] | Type | Width [min] | Area [mAU*s] | Height [mAU] | Area %  |
|--------|---------------|------|-------------|--------------|--------------|---------|
| 1      | 10.311        | VB   | 0.2641      | 507.50729    | 28.45744     | 2.0261  |
| 2      | 21.876        | BP   | 0.6369      | 1.02009e4    | 241.46463    | 40.7245 |
| 3      | 27.056        | BP   | 0.7597      | 794.83325    | 15.99607     | 3.1732  |
| 4      | 35.258        | BP   | 1.8231      | 1.35453e4    | 128.77971    | 54.0762 |

T= 12 h , ee values in 2S-endo-isomer : 88%

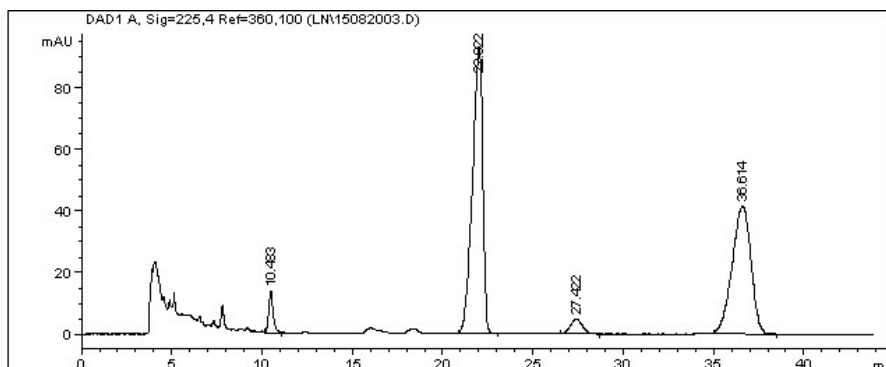

=====  
Area Percent Report  
=====

Sorted By : Signal  
Multiplier : 1.0000  
Dilution : 1.0000  
Use Multiplier & Dilution Factor with ISTDs

Signal 1: DAD1 A, Sig=225,4 Ref=360,100

| Peak # | RetTime [min] | Type | Width [min] | Area [mAU*s] | Height [mAU] | Area %  |
|--------|---------------|------|-------------|--------------|--------------|---------|
| 1      | 10.483        | BB   | 0.2560      | 227.04349    | 13.51404     | 3.1623  |
| 2      | 22.022        | BP   | 0.6067      | 3694.70728   | 93.16764     | 51.4599 |
| 3      | 27.422        | BB   | 0.7632      | 230.55415    | 4.70892      | 3.2112  |
| 4      | 36.614        | BP   | 1.1255      | 3027.47534   | 41.57715     | 42.1667 |

T= 24 h , ee values in 2S-endo-isomer : 83%

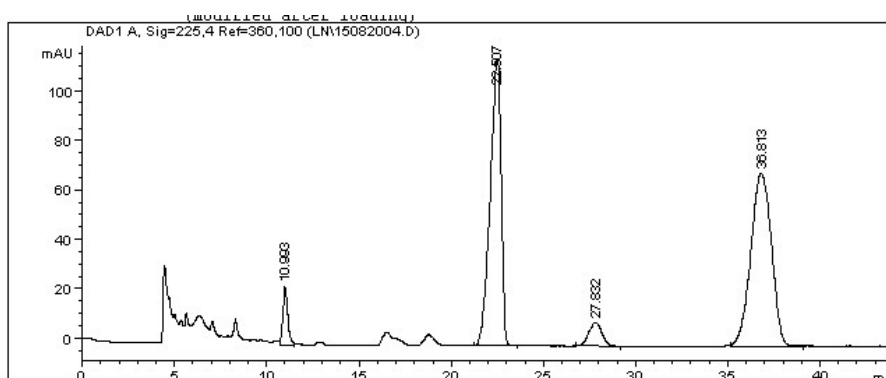

=====  
Area Percent Report  
=====

Sorted By : Signal  
Multiplier : 1.0000  
Dilution : 1.0000  
Use Multiplier & Dilution Factor with ISTDs

Signal 1: DAD1 A, Sig=225,4 Ref=360,100

| Peak # | RetTime [min] | Type | Width [min] | Area [mAU*s] | Height [mAU] | Area %  |
|--------|---------------|------|-------------|--------------|--------------|---------|
| 1      | 10.993        | MM R | 0.3117      | 441.55316    | 23.61311     | 3.9588  |
| 2      | 22.507        | BP   | 0.6390      | 4796.51611   | 115.85979    | 43.0033 |
| 3      | 27.832        | BP   | 0.7816      | 476.02811    | 9.61577      | 4.2678  |
| 4      | 36.813        | BB   | 1.2470      | 5439.72949   | 69.66243     | 48.7701 |

T=36 h , ee values in 2S-endo-isomer : 80%

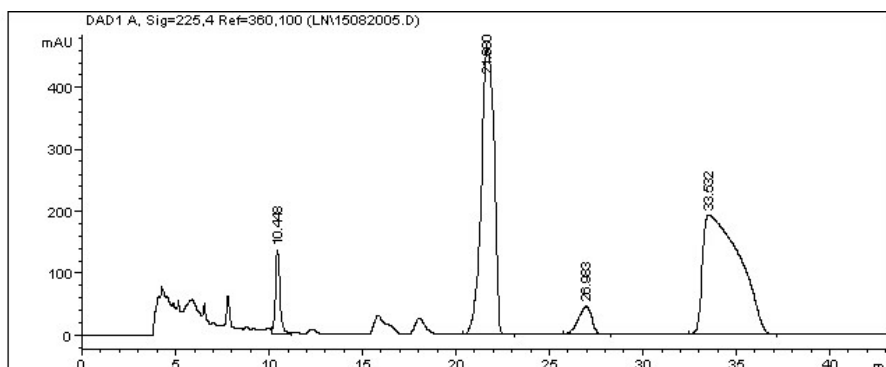

=====  
 Area Percent Report  
 =====

Sorted By : Signal  
 Multiplier : 1.0000  
 Dilution : 1.0000  
 Use Multiplier & Dilution Factor with ISTDs

Signal 1: DAD1 A, Sig=225,4 Ref=360,100

| Peak # | RetTime [min] | Tvpe | Width [min] | Area [mAU*s] | Height [mAU] | Area %  |
|--------|---------------|------|-------------|--------------|--------------|---------|
| 1      | 10.448        | VB   | 0.2625      | 2407.61743   | 136.01732    | 4.5097  |
| 2      | 21.680        | PB   | 0.7810      | 2.22346e4    | 462.38345    | 41.6476 |
| 3      | 26.983        | BP   | 0.7806      | 2271.18848   | 45.63766     | 4.2542  |
| 4      | 33.532        | BB   | 1.9326      | 2.64741e4    | 192.96602    | 49.5886 |

T=48 h , ee values in 2S-endo-isomer : 73%

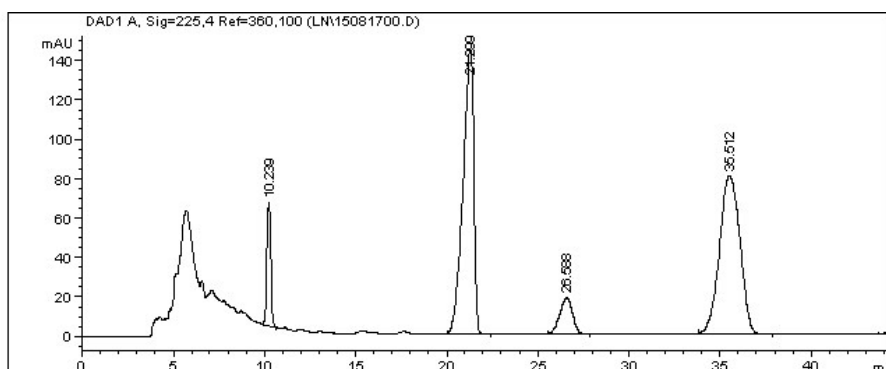

=====  
 Area Percent Report  
 =====

Sorted By : Signal  
 Multiplier : 1.0000  
 Dilution : 1.0000  
 Use Multiplier & Dilution Factor with ISTDs

Signal 1: DAD1 A, Sig=225,4 Ref=360,100

| Peak # | RetTime [min] | Tvpe | Width [min] | Area [mAU*s] | Height [mAU] | Area %  |
|--------|---------------|------|-------------|--------------|--------------|---------|
| 1      | 10.239        | MM R | 0.2374      | 897.29095    | 62.98620     | 6.4569  |
| 2      | 21.299        | BP   | 0.6134      | 5859.77637   | 144.42162    | 42.1667 |
| 3      | 26.588        | BP   | 0.7450      | 894.77893    | 18.34726     | 6.4388  |
| 4      | 35.512        | BP   | 1.2574      | 6244.83594   | 80.11901     | 44.9376 |

## HPLC spectra for Figure2 in manuscript

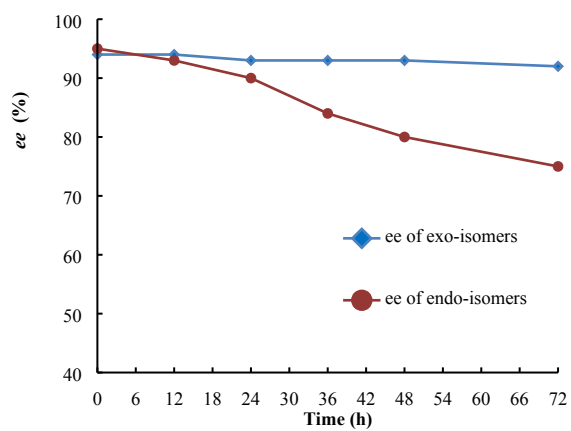

**Fig. 2** The stability of isolated aldehyde adducts in CH<sub>3</sub>CN-H<sub>2</sub>O system: aldehyde products (1 mmol, 94% *ee* in 2*S*-endo-isomers, 95% *ee* in 2*S*-exo-isomers), 20 mol% **1a**, 100 mol% TFA, CH<sub>3</sub>CN (1.9 mL), H<sub>2</sub>O (0.1 mL), r.t..

T=0 h , *ee* values in *endo-isomer* (95%) and *exo-isomer* (94%)

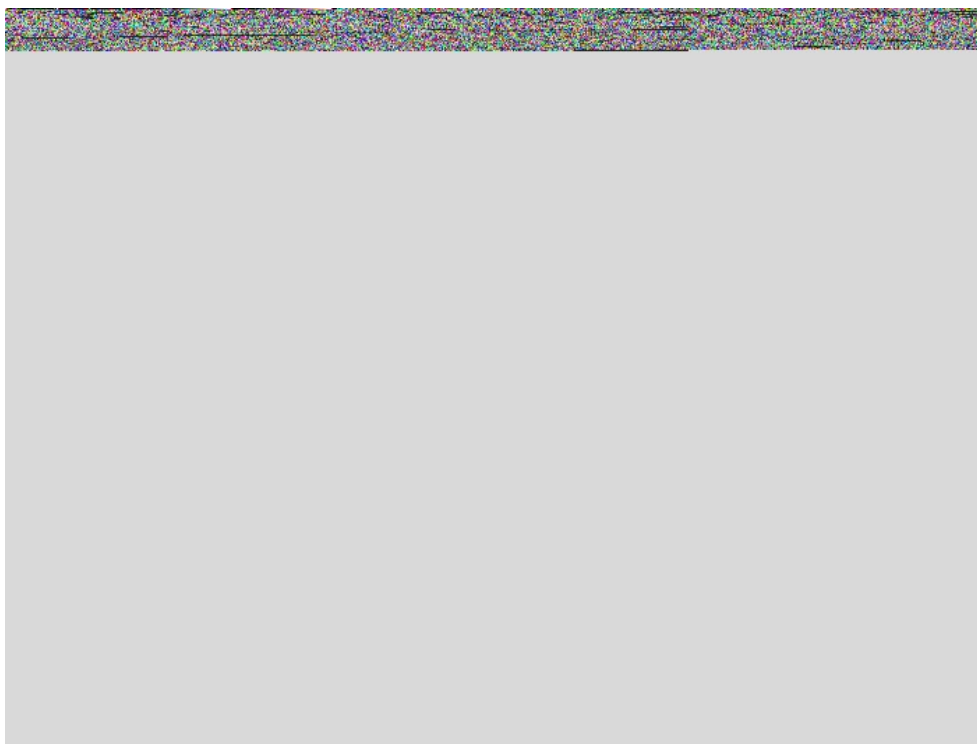

T=12 h , ee values in *endo*-isomer (93%) and *exo*-isomer (94%)

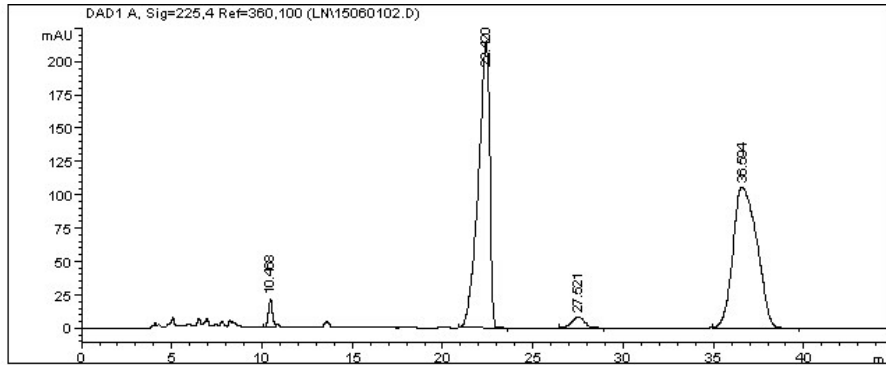

=====  
Area Percent Report  
=====

Sorted By : Signal  
Multiplier : 1.0000  
Dilution : 1.0000  
Use Multiplier & Dilution Factor with ISTDs

Signal 1: DAD1 A, Sig=225,4 Ref=360,100

| Peak # | RetTime [min] | Type | Width [min] | Area [mAU*s] | Height [mAU] | Area %  |
|--------|---------------|------|-------------|--------------|--------------|---------|
| 1      | 10.468        | MM R | 0.2589      | 323.99570    | 20.86004     | 1.6193  |
| 2      | 22.420        | BB   | 0.6494      | 9476.46973   | 215.33949    | 47.3630 |
| 3      | 27.521        | BB   | 0.7965      | 424.82736    | 8.47954      | 2.1233  |
| 4      | 36.594        | BP   | 1.5509      | 9782.88770   | 105.78684    | 48.8944 |

T=24 h , ee values in *endo*-isomer (90%) and *exo*-isomer (93%)

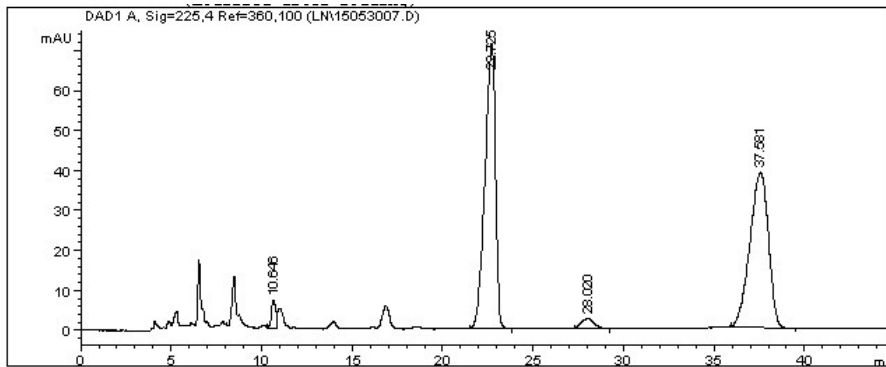

=====  
Area Percent Report  
=====

Sorted By : Signal  
Multiplier : 1.0000  
Dilution : 1.0000  
Use Multiplier & Dilution Factor with ISTDs

Signal 1: DAD1 A, Sig=225,4 Ref=360,100

| Peak # | RetTime [min] | Type | Width [min] | Area [mAU*s] | Height [mAU] | Area %  |
|--------|---------------|------|-------------|--------------|--------------|---------|
| 1      | 10.646        | VV   | 0.2468      | 113.75322    | 6.81216      | 1.9251  |
| 2      | 22.725        | BP   | 0.6132      | 2890.74951   | 71.26836     | 48.9217 |
| 3      | 28.020        | BP   | 0.6795      | 121.38595    | 2.54951      | 2.0543  |
| 4      | 37.581        | BP   | 1.1037      | 2783.04175   | 38.85152     | 47.0989 |

T=36 h , ee values in *endo*-isomer (84%) and *exo*-isomer (93%)

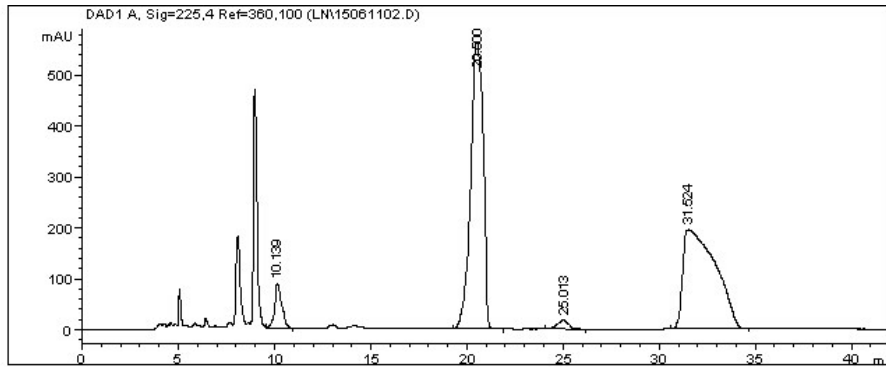

=====  
Area Percent Report  
=====

Sorted By : Signal  
Multiplier : 1.0000  
Dilution : 1.0000  
Use Multiplier & Dilution Factor with ISTDs

Signal 1: DAD1 A, Sig=225,4 Ref=360,100

| Peak # | RetTime [min] | Tvpe | Width [min] | Area [mAU*s] | Height [mAU] | Area %  |
|--------|---------------|------|-------------|--------------|--------------|---------|
| 1      | 10.139        | VB   | 0.3726      | 2246.44702   | 87.19568     | 4.3398  |
| 2      | 20.500        | BB   | 0.7392      | 2.56956e4    | 564.35150    | 49.6394 |
| 3      | 25.013        | BB   | 0.6759      | 730.62921    | 16.78360     | 1.4115  |
| 4      | 31.524        | BP   | 1.5542      | 2.30918e4    | 195.47653    | 44.6094 |

T=48 h , ee values in *endo*-isomer (80%) and *exo*-isomer (93%)

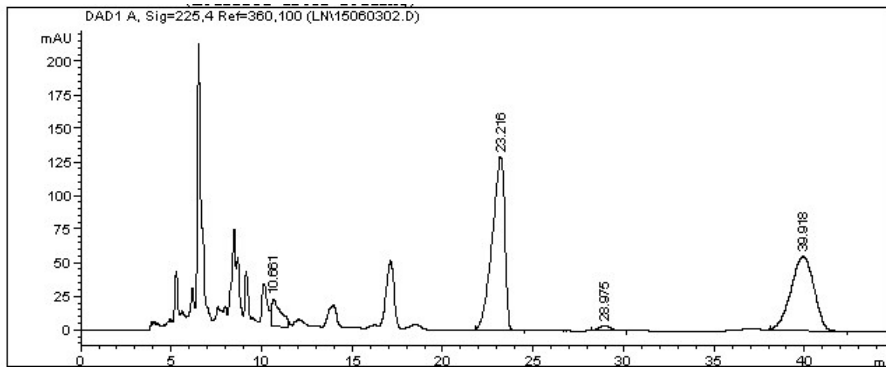

=====  
Area Percent Report  
=====

Sorted By : Signal  
Multiplier : 1.0000  
Dilution : 1.0000  
Use Multiplier & Dilution Factor with ISTDs

Signal 1: DAD1 A, Sig=225,4 Ref=360,100

| Peak # | RetTime [min] | Tvpe | Width [min] | Area [mAU*s] | Height [mAU] | Area %  |
|--------|---------------|------|-------------|--------------|--------------|---------|
| 1      | 10.661        | MM R | 0.5892      | 681.72711    | 19.28439     | 5.7350  |
| 2      | 23.216        | BP   | 0.7190      | 6193.94971   | 129.28271    | 52.1067 |
| 3      | 28.975        | BP   | 0.7432      | 187.75990    | 3.58406      | 1.5795  |
| 4      | 39.918        | BP   | 1.3925      | 4823.62451   | 54.71772     | 40.5788 |



T=72 h , ee values in *endo*-isomer (75%) and *exo*-isomer (92%)

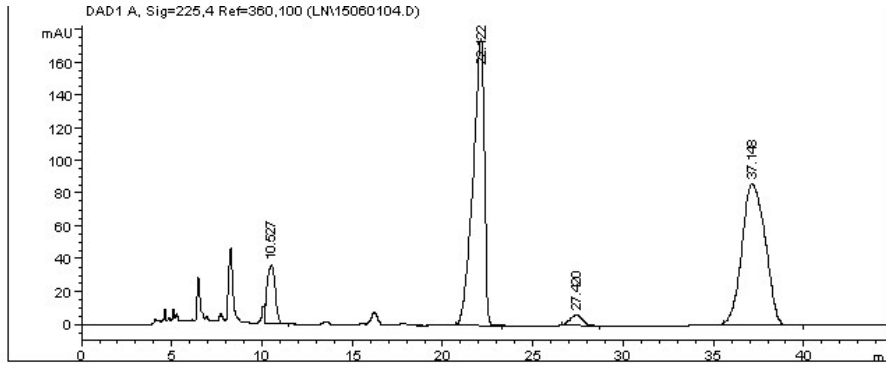

=====  
Area Percent Report  
=====

Sorted By : Signal  
Multiplier : 1.0000  
Dilution : 1.0000  
Use Multiplier & Dilution Factor with ISTDs

Signal 1: DAD1 A, Sig=225,4 Ref=360,100

| Peak # | RetTime [min] | Type | Width [min] | Area [mAU*s] | Height [mAU] | Area %  |
|--------|---------------|------|-------------|--------------|--------------|---------|
| 1      | 10.527        | VB   | 0.4916      | 1083.85425   | 35.55757     | 6.4483  |
| 2      | 22.122        | BB   | 0.6467      | 7660.56445   | 174.99257    | 45.5761 |
| 3      | 27.420        | BB   | 0.7525      | 327.71350    | 6.49726      | 1.9497  |
| 4      | 37.148        | BP   | 1.4734      | 7736.14648   | 86.00327     | 46.0258 |

HPLC spectra for Figure S1 in ESI

T=0 h , ee values in *endo*-isomer (95%) and *exo*-isomer (94%)

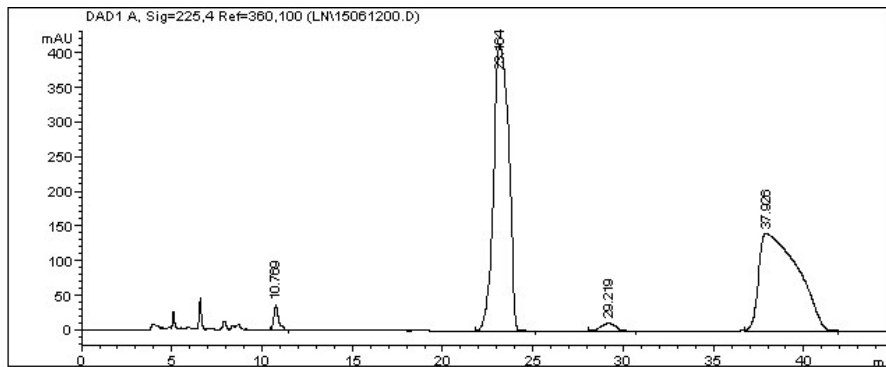

=====  
Area Percent Report  
=====

Sorted By : Signal  
Multiplier : 1.0000  
Dilution : 1.0000  
Use Multiplier & Dilution Factor with ISTDs

Signal 1: DAD1 A, Sig=225,4 Ref=360,100

| Peak # | RetTime [min] | Type | Width [min] | Area [mAU*s] | Height [mAU] | Area %  |
|--------|---------------|------|-------------|--------------|--------------|---------|
| 1      | 10.769        | BP   | 0.2707      | 660.67389    | 36.58621     | 1.4249  |
| 2      | 23.164        | BB   | 0.9649      | 2.40303e4    | 414.16150    | 51.8271 |
| 3      | 29.219        | BB   | 0.7539      | 649.87408    | 11.11955     | 1.4016  |
| 4      | 37.926        | BB   | 1.9235      | 2.10254e4    | 140.69432    | 45.3464 |

T=12 h , ee values in *endo*-isomer (95%) and *exo*-isomer (94%)

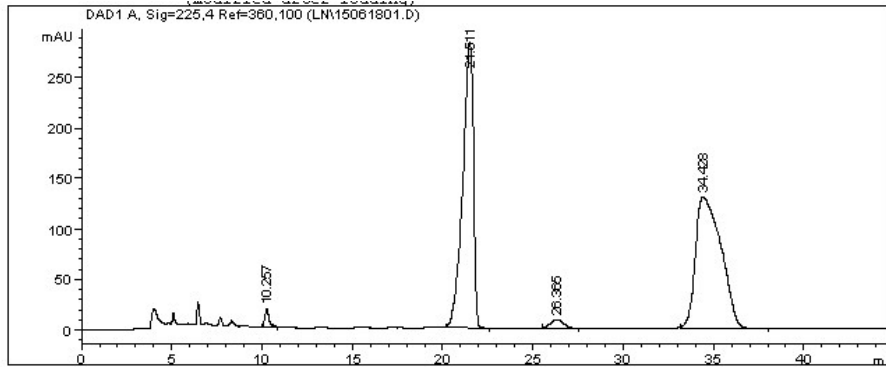

=====  
Area Percent Report  
=====

Sorted By : Signal  
Multiplier : 1.0000  
Dilution : 1.0000  
Use Multiplier & Dilution Factor with ISTDs

Signal 1: DAD1 A, Sig=225,4 Ref=360,100

| Peak # | RetTime [min] | Type | Width [min] | Area [mAU*s] | Height [mAU] | Area %  |
|--------|---------------|------|-------------|--------------|--------------|---------|
| 1      | 10.257        | BP   | 0.2472      | 299.94528    | 18.69756     | 1.2056  |
| 2      | 21.511        | BB   | 0.6148      | 1.15243e4    | 283.14890    | 46.3192 |
| 3      | 26.365        | BB   | 0.7042      | 379.44745    | 8.19518      | 1.5251  |
| 4      | 34.428        | BB   | 1.6879      | 1.26765e4    | 129.73596    | 50.9501 |

T=24 h , ee values in *endo*-isomer (93%) and *exo*-isomer (93%)

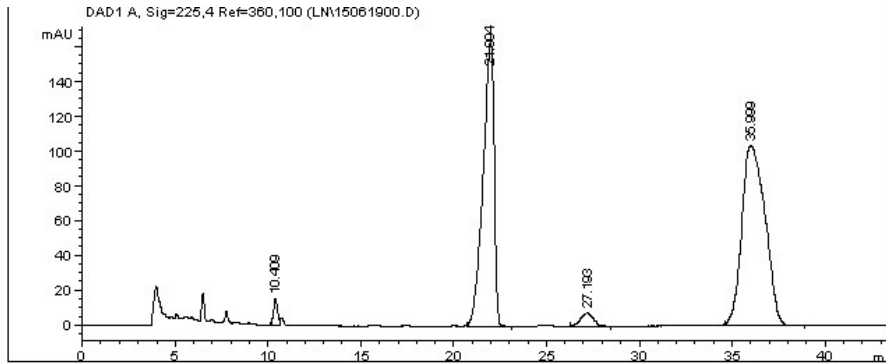

=====  
Area Percent Report  
=====

Sorted By : Signal  
Multiplier : 1.0000  
Dilution : 1.0000  
Use Multiplier & Dilution Factor with ISTDs

Signal 1: DAD1 A, Sig=225,4 Ref=360,100

| Peak # | RetTime [min] | Type | Width [min] | Area [mAU*s] | Height [mAU] | Area %  |
|--------|---------------|------|-------------|--------------|--------------|---------|
| 1      | 10.409        | BV   | 0.2291      | 230.93750    | 15.56846     | 1.4033  |
| 2      | 21.994        | BP   | 0.6167      | 6839.79785   | 164.61702    | 41.5630 |
| 3      | 27.193        | BP   | 0.7579      | 362.34909    | 7.41724      | 2.2019  |
| 4      | 35.999        | BB   | 1.4476      | 9023.38574   | 103.65433    | 54.8318 |

T=36 h , ee values in *endo*-isomer (93%) and *exo*-isomer (92%)

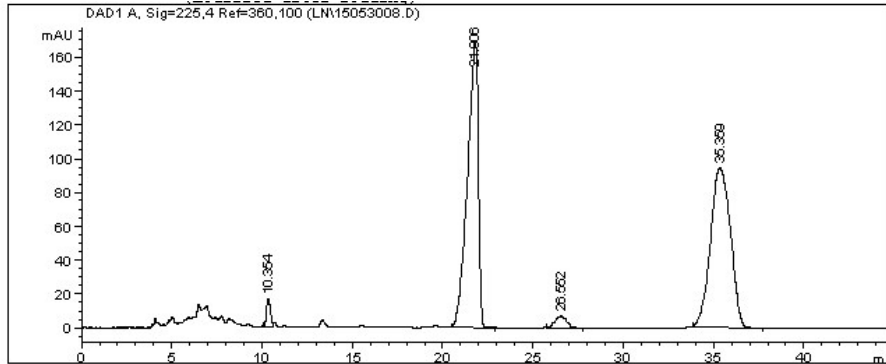

=====  
Area Percent Report  
=====

Sorted By : Signal  
Multiplier : 1.0000  
Dilution : 1.0000  
Use Multiplier & Dilution Factor with ISTDs

Signal 1: DAD1 A, Sig=225,4 Ref=360,100

| Peak # | RetTime [min] | Tvpe | Width [min] | Area [mAU*s] | Height [mAU] | Area %  |
|--------|---------------|------|-------------|--------------|--------------|---------|
| 1      | 10.354        | MM R | 0.2536      | 252.15631    | 16.57029     | 1.6953  |
| 2      | 21.806        | BB   | 0.6161      | 7021.85059   | 169.23514    | 47.2102 |
| 3      | 26.552        | BB   | 0.7112      | 313.98285    | 6.89637      | 2.1110  |
| 4      | 35.359        | BP   | 1.2566      | 7285.59766   | 94.37815     | 48.9835 |

T=48 h , ee values in *endo*-isomer (93%) and *exo*-isomer (92%)

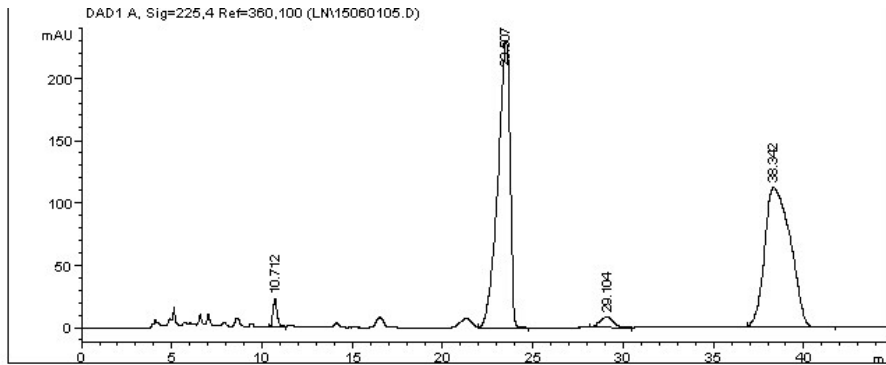

=====  
Area Percent Report  
=====

Sorted By : Signal  
Multiplier : 1.0000  
Dilution : 1.0000  
Use Multiplier & Dilution Factor with ISTDs

Signal 1: DAD1 A, Sig=225,4 Ref=360,100

| Peak # | RetTime [min] | Tvpe | Width [min] | Area [mAU*s] | Height [mAU] | Area %  |
|--------|---------------|------|-------------|--------------|--------------|---------|
| 1      | 10.712        | BB   | 0.2698      | 400.14087    | 22.68261     | 1.7611  |
| 2      | 23.507        | VB   | 0.7116      | 1.07883e4    | 229.83121    | 47.4817 |
| 3      | 29.104        | BP   | 0.8117      | 459.72009    | 8.76844      | 2.0233  |
| 4      | 38.342        | BB   | 1.6673      | 1.10728e4    | 111.82038    | 48.7338 |

T=72 h , *ee* values in *endo*-isomer (92%) and *exo*-isomer (91%)

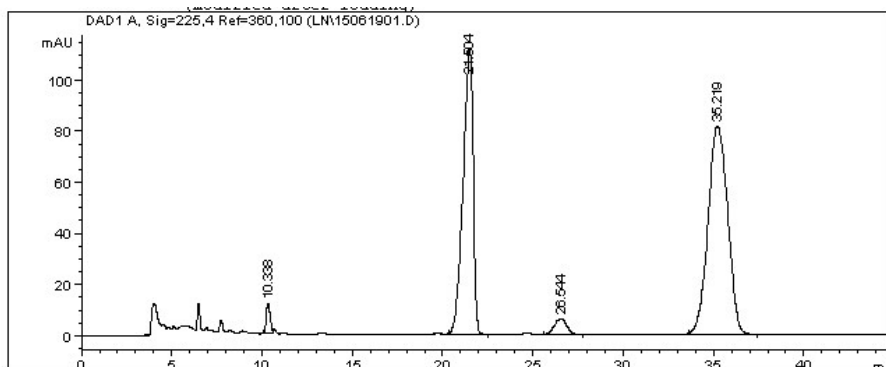

=====  
 Area Percent Report  
 =====

Sorted By : Signal  
 Multiplier : 1.0000  
 Dilution : 1.0000  
 Use Multiplier & Dilution Factor with ISTDs

Signal 1: DAD1 A, Sig=225,4 Ref=360,100

| Peak # | RetTime [min] | Type | Width [min] | Area [mAU*s] | Height [mAU] | Area %  |
|--------|---------------|------|-------------|--------------|--------------|---------|
| 1      | 10.338        | BV   | 0.2267      | 172.87318    | 11.81619     | 1.5913  |
| 2      | 21.504        | BB   | 0.5711      | 4285.38428   | 111.81972    | 39.4464 |
| 3      | 26.544        | BB   | 0.7042      | 278.78607    | 6.06531      | 2.5662  |
| 4      | 35.219        | BP   | 1.2104      | 6126.76270   | 81.37682     | 56.3961 |

The molecular models and the calculation results:

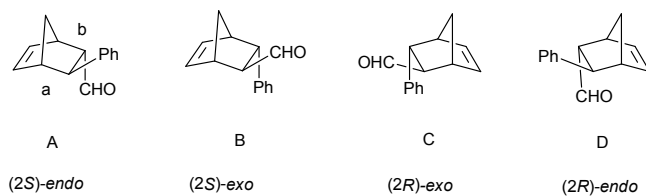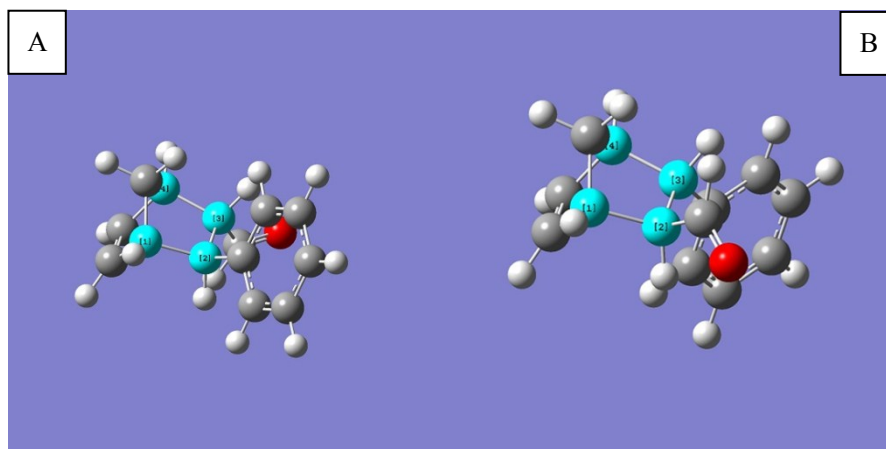

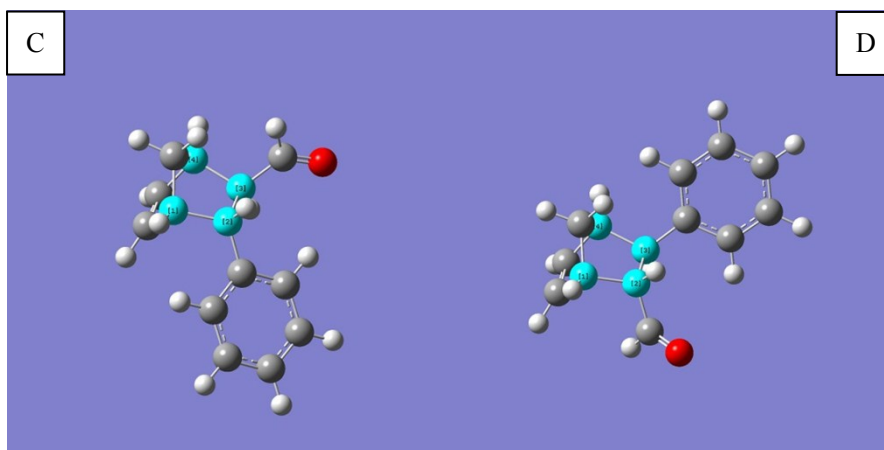

| 化合物 | a 键长 (Å) | b 键长 (Å) | 平均键长 (Å) |
|-----|----------|----------|----------|
| A   | 1.60215  | 1.59614  | 1.599145 |
| B   | 1.60458  | 1.59671  | 1.600645 |
| C   | 1.58403  | 1.58876  | 1.586395 |
| D   | 1.58886  | 1.58371  | 1.586285 |

## References:

1. K. A. Ahrendt, C. J. Borths, and D. W. C. MacMillan, *J. Am. Chem. Soc.*, 2000, **122**, 4243.
2. X. R. Liang, S. M. Li and W. K. Su, *Tetrahedron Lett.*, 2012, **53**, 289.
3. X. R. Liang, J. Y. Fan, F. Shi and W. K. Su, *Tetrahedron Lett.*, 2010, 51, 2505.
4. X. R. Liang, N. Li, X. L. Chen and W. K. Su, *RSC Adv.*, 2014, **4**, 44039.
5. K. A. Ahrendt, C. J. Borths and D. W. C. MacMillan, *J. Am. Chem. Soc.*, 2000, **122**, 4243.
6. K. H. Kim, S. Lee, D. W. Lee, D. H. Ko and D. C. Ha, *Tetrahedron Lett.*, 2005, **46**, 5991.
7. A. Sakakura, K. Suzuki, K. Nakano and K. Ishihara, *Org. Lett.*, 2006, **8**, 2229.
8. T. Kano, Y. Tanaka and K. Maruoka, *Org. Lett.*, 2006, **8**, 2687.
9. H. Gotoh and Y. Hayashi, *Org. Lett.*, 2007, **9**, 2859.
10. C. Biaggi, M. Benaglia, S. Rossi, S. Proto and R. Annunziata, *Tetrahedron Lett.*, 2007, **48**, 8521.
11. Y. Hayashi, S. Samanta, H. Gotoh and H. Ishikawa, *Angew. Chem., Int. Ed.*, 2008, **47**, 6634.
12. H. He, B. J. Pei, H. H. Chou, T. Tian, W. H. Chan and A.W. M. Lee, *Org. Lett.*, 2008, **10**, 2421.
